# Supplementary material
Source: PubMed Central journal article supplement (PMC8204676)

## Supporting Information

### **Rational Design and Synthesis of Right-Handed D-Sulfono- $\gamma$ - AApeptide Helical Foldamers as Potent Inhibitors of Protein- Protein Interactions**

Peng Sang,<sup>†,#</sup> Yan Shi,<sup>†,#</sup> Pirada Higbee,<sup>§,#</sup> Minghui Wang,<sup>†</sup> Sami Abdulkadir,<sup>†</sup> Junhao  
Lu,<sup>‡</sup> Gary Daughdrill,<sup>\*</sup> § Jiandong Chen,<sup>\*,‡</sup> and Jianfeng Cai<sup>\*,†</sup>

<sup>†</sup> Department of Chemistry, University of South Florida, 4202 E. Fowler Ave., Tampa, FL  
33620, United States

<sup>‡</sup> Department of Molecular Oncology, H. Lee Moffitt Cancer Center and Research Institute,  
12902 Magnolia Drive, Tampa, FL 33612, United States

<sup>§</sup> Department of Cell Biology, Microbiology and Molecular Biology, University of South  
Florida, Tampa, FL 33620, United States

\*Corresponding author. **Email:** [jianfengcai@usf.edu](mailto:jianfengcai@usf.edu), [jiandong.chen@moffitt.org](mailto:jiandong.chen@moffitt.org) and  
[gdaughdrill@usf.edu](mailto:gdaughdrill@usf.edu)

## Table of Contents

|                                                                                                                                                        |     |
|--------------------------------------------------------------------------------------------------------------------------------------------------------|-----|
| <b>1. D-Sulfono-<math>\gamma</math>-AApeptides</b> .....                                                                                               | S3  |
| <b>1.1 HPLC Trace</b> .....                                                                                                                            | S3  |
| <b>1.2 HPLC Purities and Retention Time of Pure Peptides</b> .....                                                                                     | S8  |
| <b>2. Fluorescence Polarization Assay</b> .....                                                                                                        | S9  |
| <b>3. <math>^{15}\text{N}</math>-<math>^1\text{H}</math> HSQC NMR of Lead Peptide 4 in Complex with MDM2</b> .....                                     | S9  |
| <b>4. References</b> .....                                                                                                                             | S11 |
| <b>5. HRMS Spectra of Building Blocks 1a-j and D-Sulfono-<math>\gamma</math>-AApeptides</b> .....                                                      | S11 |
| <b>6. The <math>^1\text{H}</math> and <math>^{13}\text{C}</math> NMR Spectra of D-Sulfono-<math>\gamma</math>-AApeptide Building Blocks 1a-j</b> ..... | S23 |

# 1. D-Sulfonyl- $\gamma$ -AApeptides

## 1.1 HPLC Trace

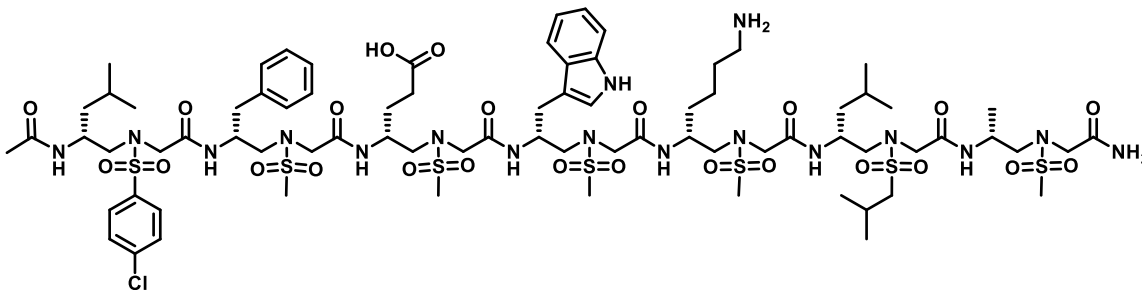

1

HRMS (ESI) ( $[M+H]^+$ ) Calcd. for  $C_{77}H_{127}ClN_{17}O_{24}S_7$ : 1932.6973, found: 967.8494  
 $[M+2H]^{2+}$ , 989.8296  $[M+2Na]^{2+}$ .

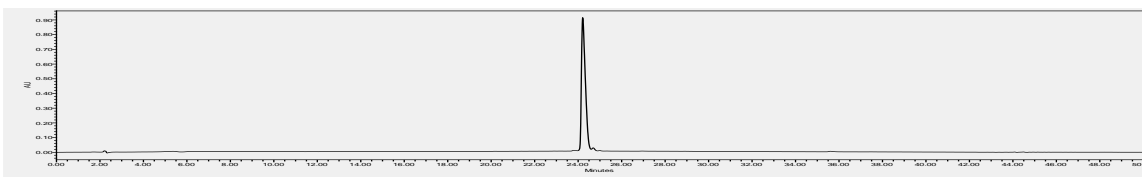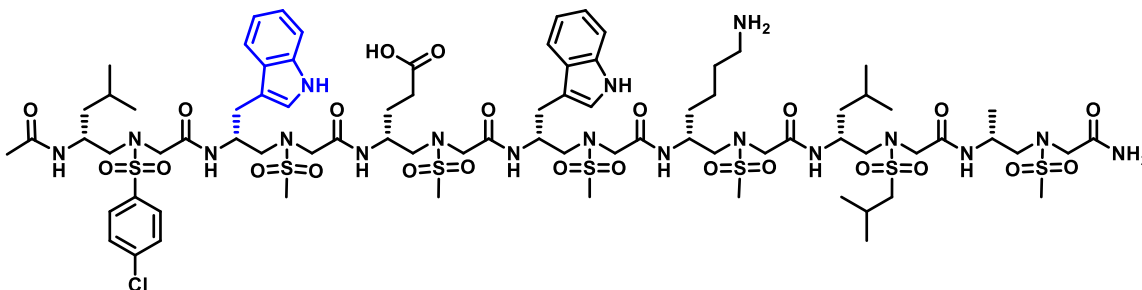

2

HRMS (ESI) ( $[M+H]^+$ ) Calcd. for  $C_{79}H_{128}ClN_{18}O_{24}S_7$ : 1971.7082, found: 987.3563  
 $[M+2H]^{2+}$ , 1008.3370  $[M+2Na]^{2+}$ .

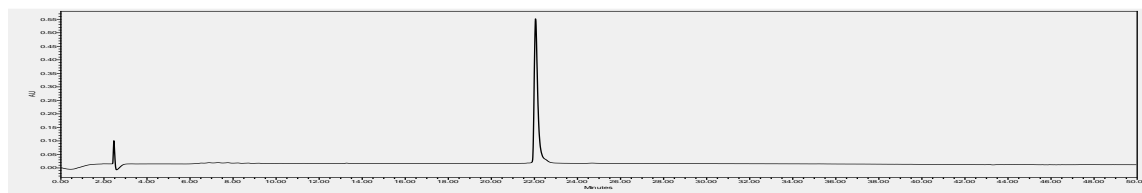

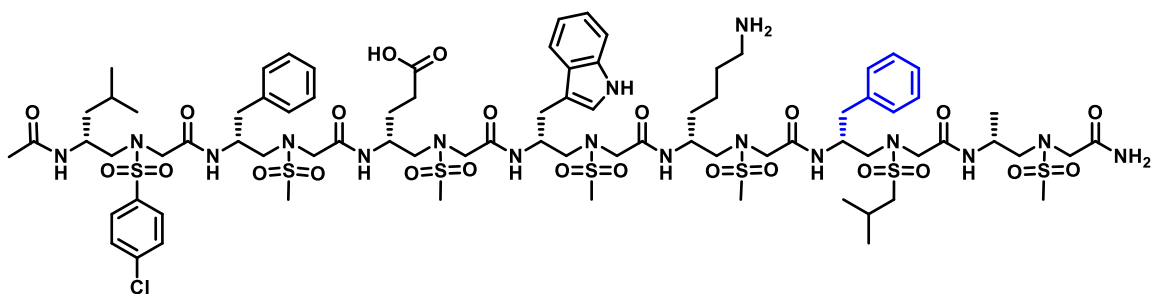

3

HRMS (ESI) ( $[M+H]^+$ ) Calcd. for  $C_{80}H_{125}ClN_{17}O_{24}S_7$ : 1966.6817, found: 984.8426  
 $[M+2H]^{2+}$ , 1006.8241  $[M+2Na]^{2+}$ , 1022.7915  $[M+2K]^{2+}$ .

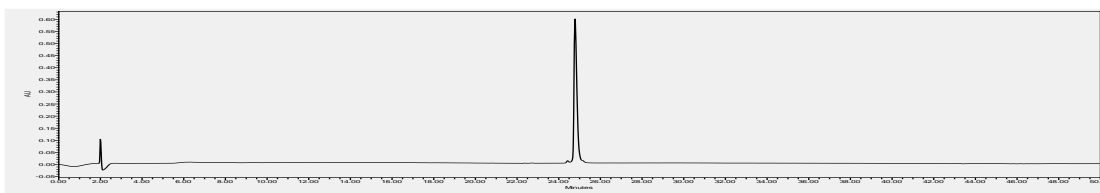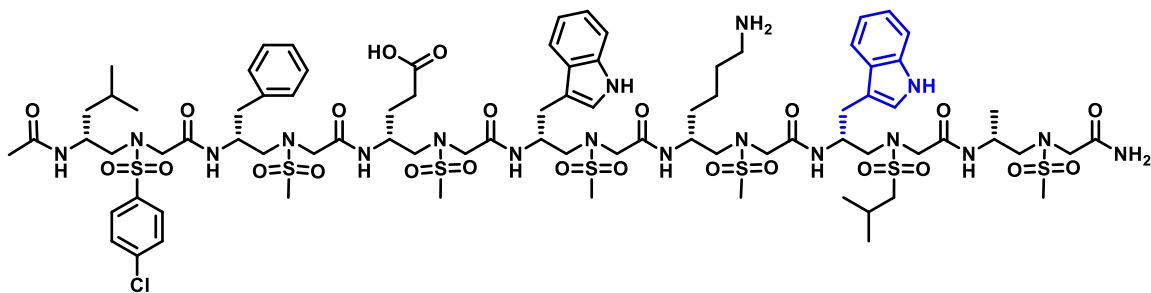

4

HRMS (ESI) ( $[M+H]^+$ ) Calcd. for  $C_{82}H_{126}ClN_{18}O_{24}S_7$ : 2005.6926, found: 1004.3481  
 $[M+2H]^{2+}$ , 1026.3316  $[M+2Na]^{2+}$ .

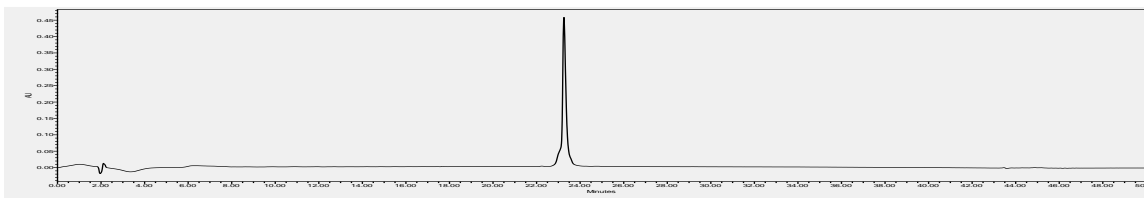

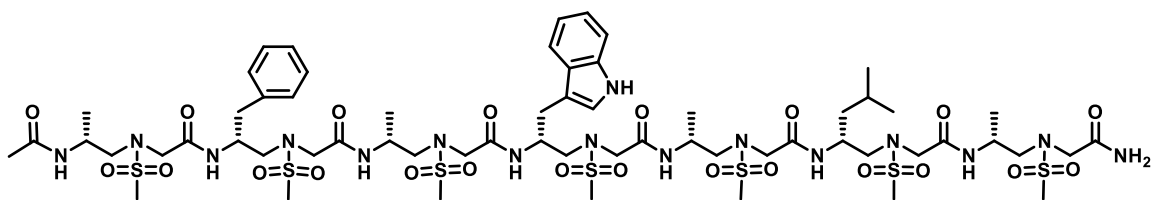

5

HRMS (ESI) ( $[M+H]^+$ ) Calcd. for  $C_{61}H_{105}N_{16}O_{22}S_7$ : 1637.5634, found: 819.2843  
 $[M+2H]^{2+}$ .

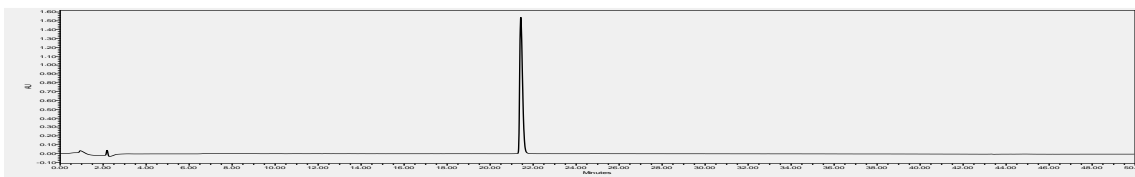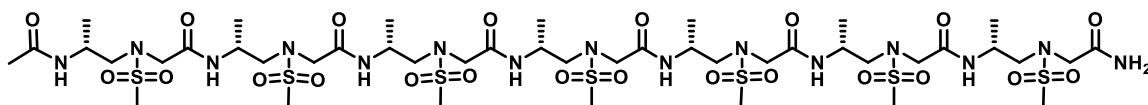

6

HRMS (ESI) ( $[M+H]^+$ ) Calcd. for  $C_{44}H_{90}N_{15}O_{22}S_7$ : 1404.4430, found: 702.7242  $[M+2H]^{2+}$ ,  
 724.7053  $[M+2Na]^{2+}$ .

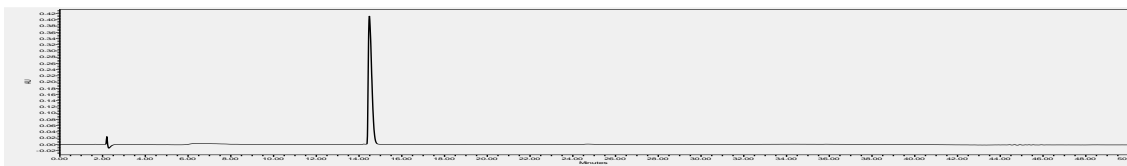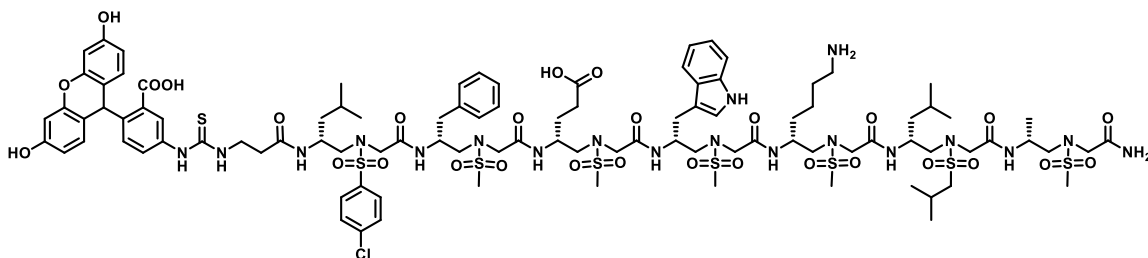

1-FITC

HRMS (ESI) ( $[M+H]^+$ ) Calcd. for  $C_{99}H_{143}ClN_{19}O_{29}S_8$ : 2352.7753, found: 1176.8810  
 $[M+2H]^{2+}$ .

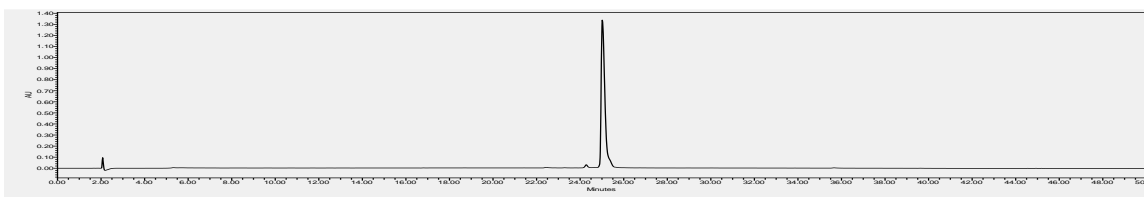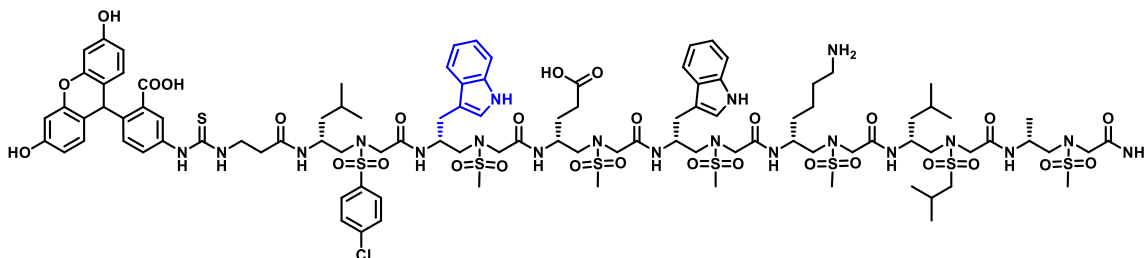

**2-FITC**

HRMS (ESI) ( $[M+H]^+$ ) Calcd. for  $C_{101}H_{144}ClN_{20}O_{29}S_8$ : 2391.7862, found: 1196.3865  
 $[M+2H]^{2+}$ .

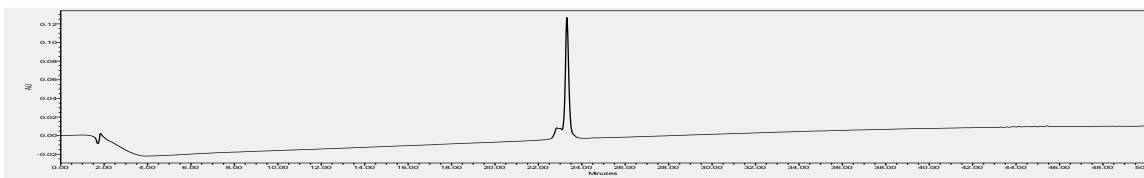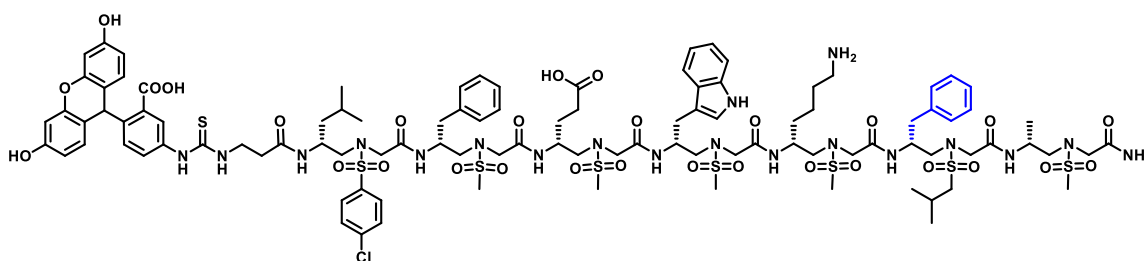

**3-FITC**

HRMS (ESI) ( $[M+H]^+$ ) Calcd. for  $C_{102}H_{141}ClN_{19}O_{29}S_8$ : 2386.7597, found: 1193.8731  
 $[M+2H]^{2+}$ .

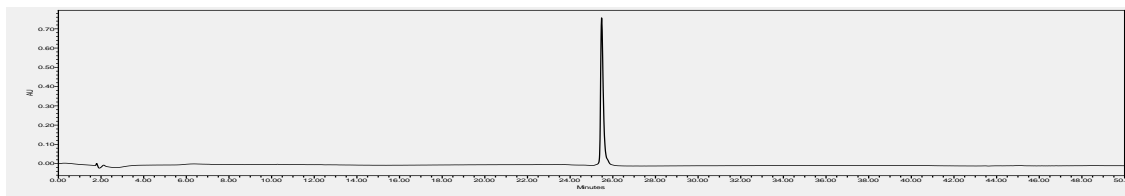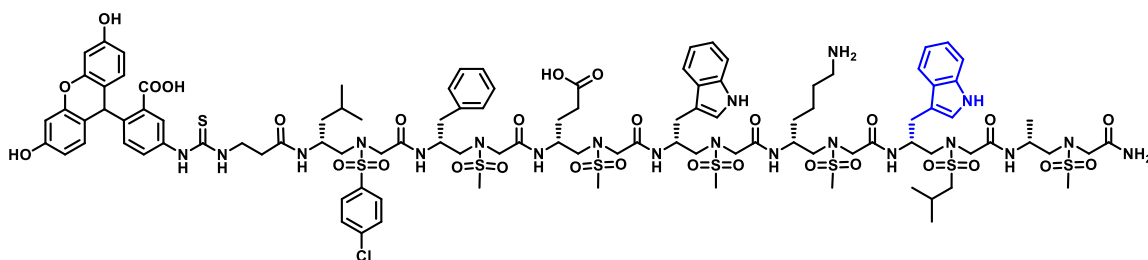

#### 4-FITC

HRMS (ESI) ( $[M+H]^+$ ) Calcd. for  $C_{104}H_{142}ClN_{20}O_{29}S_8$ : 2425.7706, found: 809.2550  
 $[M+3H]^3+$ .

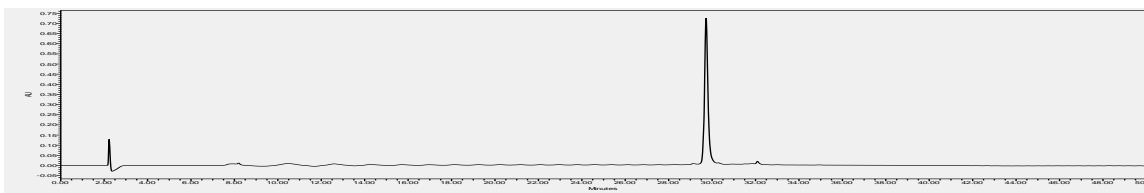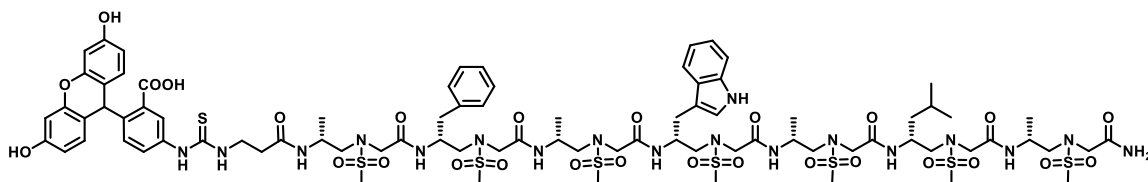

#### 5-FITC

HRMS (ESI) ( $[M+H]^+$ ) Calcd. for  $C_{83}H_{121}N_{18}O_{27}S_8$ : 2057.6414, found: 1029.3132  
 $[M+2H]^2+$ .

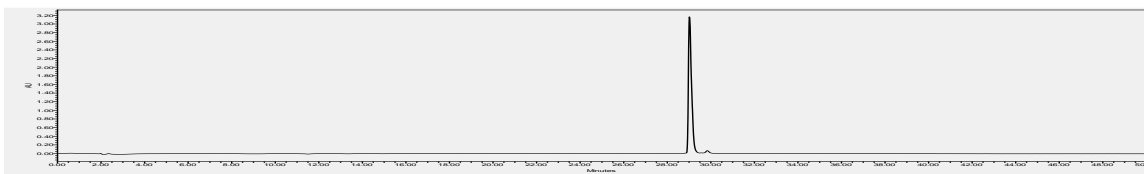

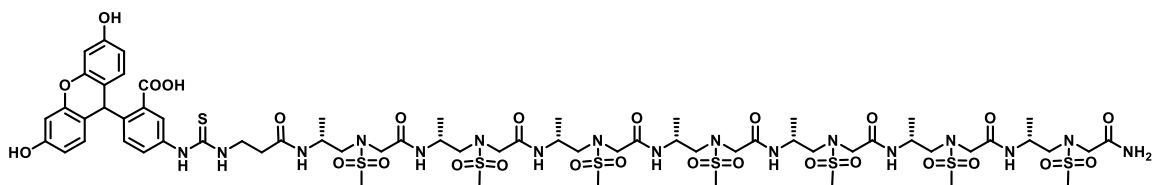

### 6-FITC

HRMS (ESI) ( $[M+H]^+$ ) Calcd. for  $C_{66}H_{106}N_{17}O_{27}S_8$ : 1824.5210, found: 912.7547  
 $[M+2H]^{2+}$ , 934.7352  $[M+2Na]^{2+}$ .

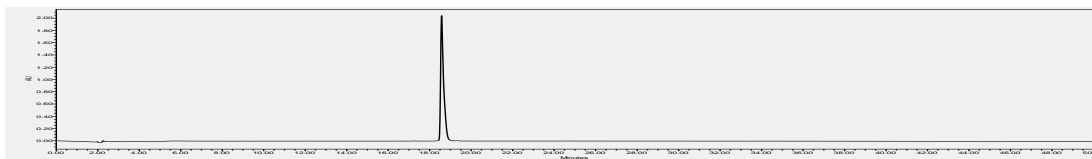

**Figure S1.** HPLC spectra of D-sulfono- $\gamma$ -AApeptides

## 1.2 HPLC Purities and Retention Time of Pure Peptides.

**Table S1.** HPLC purities and retention time of D-sulfono- $\gamma$ -AApeptides.<sup>a</sup>

| Peptide Name | Purity trace after HPLC purification (%) | Retention Time (min) |
|--------------|------------------------------------------|----------------------|
| 1            | 99.56%                                   | 24.211               |
| 2            | 100.00%                                  | 22.054               |
| 3            | 98.86%                                   | 24.784               |
| 4            | 99.10%                                   | 23.255               |
| 5            | 100.00%                                  | 21.426               |
| 6            | 100.00%                                  | 14.484               |
| 1-FITC       | 98.71%                                   | 25.021               |
| 2-FITC       | 96.66%                                   | 23.312               |
| 3-FITC       | 100.00%                                  | 25.476               |
| 4-FITC       | 98.96%                                   | 29.723               |
| 5-FITC       | 99.10%                                   | 29.021               |
| 6-FITC       | 100.00%                                  | 18.391               |

<sup>a</sup> The gradient eluting method of 5% to 100% of solvent B (0.1% TFA in acetonitrile) in A (0.1% TFA in water) over 50 min was performed.



## 2. Fluorescence Polarization Assay

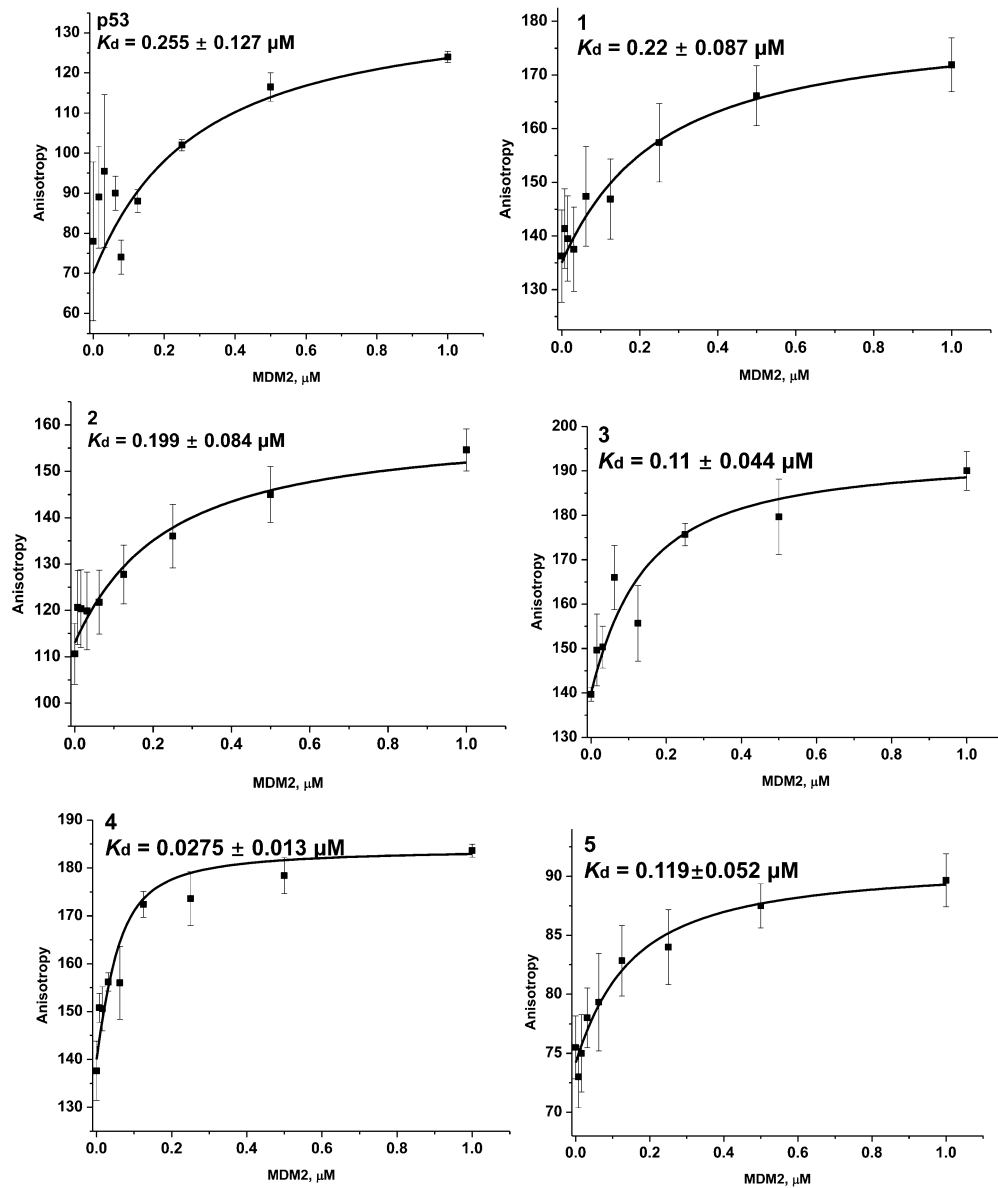

**Figure S2.** The  $K_d$  data of regular p53 and D-sulfono- $\gamma$ -AApeptides 1-5.

## 3. $^{15}\text{N}$ - $^1\text{H}$ HSQC NMR of Lead Peptide 4 in Complex with MDM2

### Methods

#### Protein Purification for NMR

$^{15}\text{N}$ -labeled human MDM2 residues 17–125 was expressed and purified as described in [2].

#### NMR Data Collection and Analysis

Experiments for 200  $\mu\text{M}$  MDM2<sub>17-125</sub> in the presence and absence of stoichiometric equivalent of peptide **4** were carried out at 25 °C on a Varian VNMRs 800-MHz spectrometry with a triple resonance pulse field Z-axis gradient cold probe at 30 °C. <sup>1</sup>H-<sup>15</sup>N heteronuclear single-quantum coherence spectroscopy experiments were performed on <sup>15</sup>N-labeled samples in 90% H<sub>2</sub>O/ 10% D<sub>2</sub>O. Buffer for peptide **4** and MDM2<sub>17-125</sub> experiments was 50 mM NaH<sub>2</sub>PO<sub>4</sub>, 50 mM NaCl, 1 mM EDTA, 2 mM DTT, 5% DMSO, and 0.02% NaN<sub>3</sub> at pH 6.8. Data were acquired in the <sup>1</sup>H and <sup>15</sup>N dimension using 9689.92-Hz (*t*<sub>2</sub>) x 2430.26-Hz (*t*<sub>1</sub>) sweep widths and 1024 (*t*<sub>2</sub>) x 128 (*t*<sub>1</sub>) complex data points. Bound spectra were collected in a molar equivalent of the peptide **4**.

Resonance assignments for apo MDM2<sub>17-125</sub> were previously made [2]. Bound chemical shifts were inferred based on the overlap of resonances in parallel titrations (Figure S3). Using this method, the bound resonances for 99 residues were assigned. For the nine unassignable residues, four were prolines which are not detected, two residues, S17 and Q18, were near the N-terminus, and the remaining three were D46, L81, and N106 were not assigned in apo MDM2<sub>17-125</sub> [2]. In addition, residue Y67 experienced line broadening during titration and the bound peak was not observed.

The combined average chemical shifts were calculated from the formula  $\Delta_{ave} = [((\Delta^1\text{H}^{\text{N}})^2 + (\Delta^{15}\text{N}/5)^2)/2]^{1/2}$ . All NMR spectra were processed with NMRfx and analyzed using NMRViewJ software [3, 4].

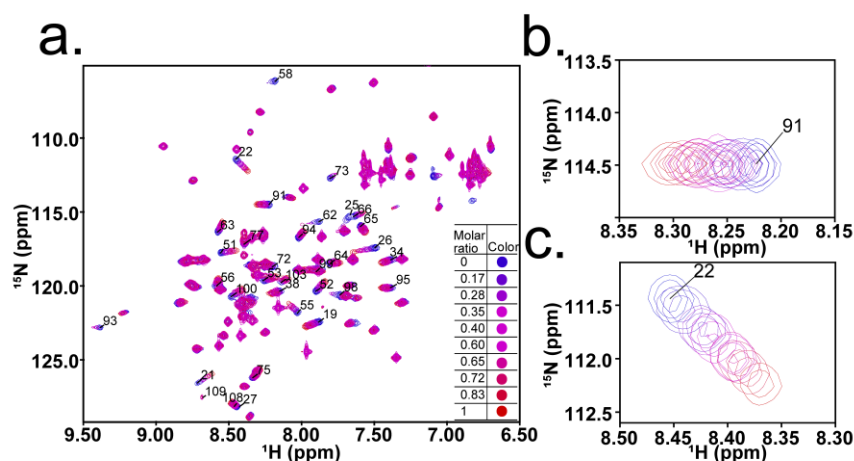

**Figure S3.** NMR titration results and resonance assignments of MDM2<sub>17-125</sub> interacting with **4**. **a.** Overlay of <sup>1</sup>H -<sup>15</sup>N HSQC spectra for MDM2<sub>17-125</sub> before (blue) and after the addition of increasing concentrations of **4** (see legend for molar ratios of titration points).

For clarity residue labels are shown for resonances with chemical shift changes greater than 0.032 ppm. **b.** Chemical shifts of F91 during the titration show clear overlap of free and bound resonances. **c.** Chemical shifts of S22 during the titration show clear overlap of free and bound resonances.

#### 4. References

- (1) Sang, P.; Zhang, M.; Shi, Y.; Li, C.; Abdulkadir, S.; Li, Q.; Ji, H.; Cai, J., *Proc. Natl. Acad. Sci. U. S. A.*, **2019**, 116, 10757-10762.
- (2) Borchers, W.; Theillet, F.-X.; Katzer, A.; Finzel, A.; Mishall, K. M.; Powell, A. T.; Wu, H.; Manieri, W.; Dieterich, C.; Selenko, P.; Loewer, A.; Daughdrill, G. W., *Nat. Chem. Biol.*, **2014**, 10 (12), 1000-1002
- (3) Johnson, B.A., Using NMRView to visualize and analyze the NMR spectra of macromolecules, in *Protein NMR Techniques*. **2004**, Springer. p. 313-352.
- (4) Johnson, B.A.; Blevins, R.A., *J. biomol. NMR*, **1994**, 4(5), 603-614.

#### 5. HRMS Spectra of Building Blocks 1a-j and D-Sulfonyl-AApeptides

##### HRMS spectra of 1a

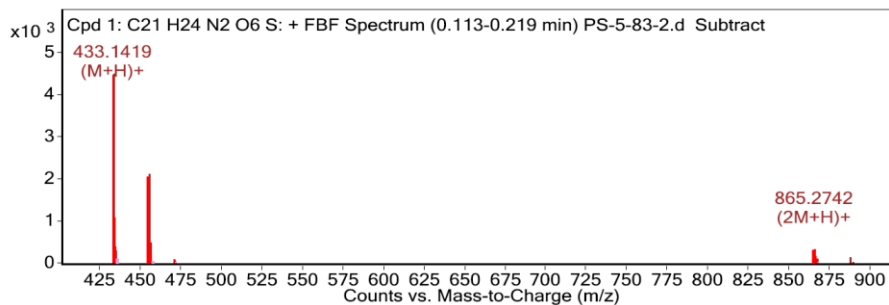

MS Spectrum Peak List

| m/z      | z | Abund   | Formula                                                                         | Ion                  |
|----------|---|---------|---------------------------------------------------------------------------------|----------------------|
| 433.1419 | 1 | 4511.36 | C <sub>21</sub> H <sub>25</sub> N <sub>2</sub> O <sub>6</sub> S                 | (M+H) <sup>+</sup>   |
| 434.1447 | 1 | 1101.61 | C <sub>21</sub> H <sub>25</sub> N <sub>2</sub> O <sub>6</sub> S                 | (M+H) <sup>+</sup>   |
| 435.1424 | 1 | 324.79  | C <sub>21</sub> H <sub>25</sub> N <sub>2</sub> O <sub>6</sub> S                 | (M+H) <sup>+</sup>   |
| 455.1229 | 1 | 2135.01 | C <sub>21</sub> H <sub>24</sub> N <sub>2</sub> NaO <sub>6</sub> S               | (M+Na) <sup>+</sup>  |
| 456.1259 | 1 | 525.02  | C <sub>21</sub> H <sub>24</sub> N <sub>2</sub> NaO <sub>6</sub> S               | (M+Na) <sup>+</sup>  |
| 457.1226 | 1 | 52.91   | C <sub>21</sub> H <sub>24</sub> N <sub>2</sub> NaO <sub>6</sub> S               | (M+Na) <sup>+</sup>  |
| 471.0901 | 1 | 79.55   | C <sub>21</sub> H <sub>24</sub> KN <sub>2</sub> O <sub>6</sub> S                | (M+K) <sup>+</sup>   |
| 865.2742 | 1 | 359.58  | C <sub>42</sub> H <sub>49</sub> N <sub>4</sub> O <sub>12</sub> S <sub>2</sub>   | (2M+H) <sup>+</sup>  |
| 866.2785 | 1 | 129.05  | C <sub>42</sub> H <sub>49</sub> N <sub>4</sub> O <sub>12</sub> S <sub>2</sub>   | (2M+H) <sup>+</sup>  |
| 887.2566 | 1 | 164.59  | C <sub>42</sub> H <sub>48</sub> N <sub>4</sub> NaO <sub>12</sub> S <sub>2</sub> | (2M+Na) <sup>+</sup> |

--- End Of Report ---

## HRMS spectra of 1b

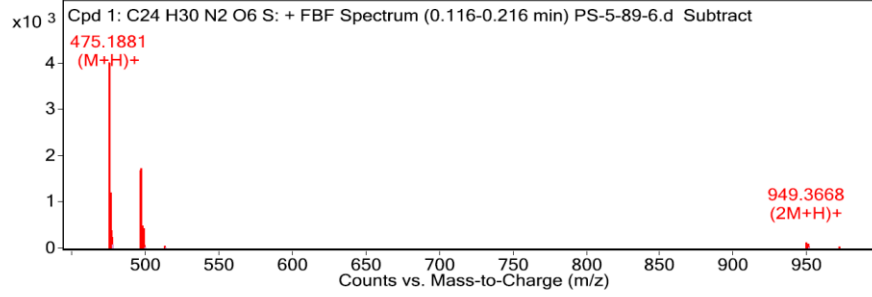

### MS Spectrum Peak List

| m/z      | z | Abund   | Formula                                                                         | Ion                  |
|----------|---|---------|---------------------------------------------------------------------------------|----------------------|
| 475.1881 | 1 | 4027.52 | C <sub>24</sub> H <sub>31</sub> N <sub>2</sub> O <sub>6</sub> S                 | (M+H) <sup>+</sup>   |
| 476.1914 | 1 | 1223.82 | C <sub>24</sub> H <sub>31</sub> N <sub>2</sub> O <sub>6</sub> S                 | (M+H) <sup>+</sup>   |
| 477.1893 | 1 | 273.12  | C <sub>24</sub> H <sub>31</sub> N <sub>2</sub> O <sub>6</sub> S                 | (M+H) <sup>+</sup>   |
| 497.1702 | 1 | 1749.32 | C <sub>24</sub> H <sub>30</sub> N <sub>2</sub> NaO <sub>6</sub> S               | (M+Na) <sup>+</sup>  |
| 498.1718 | 1 | 450.11  | C <sub>24</sub> H <sub>30</sub> N <sub>2</sub> NaO <sub>6</sub> S               | (M+Na) <sup>+</sup>  |
| 499.1718 | 1 | 102.88  | C <sub>24</sub> H <sub>30</sub> N <sub>2</sub> NaO <sub>6</sub> S               | (M+Na) <sup>+</sup>  |
| 513.1378 | 1 | 54.12   | C <sub>24</sub> H <sub>30</sub> KN <sub>2</sub> O <sub>6</sub> S                | (M+K) <sup>+</sup>   |
| 949.3668 | 1 | 111.59  | C <sub>48</sub> H <sub>61</sub> N <sub>4</sub> O <sub>12</sub> S <sub>2</sub>   | (2M+H) <sup>+</sup>  |
| 950.368  | 1 | 82      | C <sub>48</sub> H <sub>61</sub> N <sub>4</sub> O <sub>12</sub> S <sub>2</sub>   | (2M+H) <sup>+</sup>  |
| 971.3451 | 1 | 81.86   | C <sub>48</sub> H <sub>60</sub> N <sub>4</sub> NaO <sub>12</sub> S <sub>2</sub> | (2M+Na) <sup>+</sup> |

--- End Of Report ---

## HRMS spectra of 1c

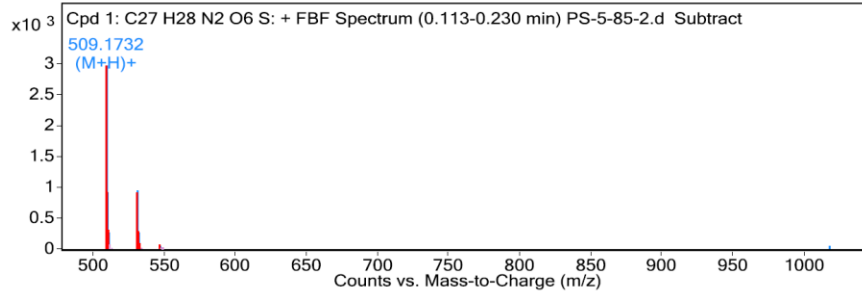

### MS Spectrum Peak List

| m/z       | z | Abund   | Formula                                                                       | Ion                 |
|-----------|---|---------|-------------------------------------------------------------------------------|---------------------|
| 509.1732  | 1 | 2994.12 | C <sub>27</sub> H <sub>29</sub> N <sub>2</sub> O <sub>6</sub> S               | (M+H) <sup>+</sup>  |
| 510.1754  | 1 | 926.66  | C <sub>27</sub> H <sub>29</sub> N <sub>2</sub> O <sub>6</sub> S               | (M+H) <sup>+</sup>  |
| 511.1737  | 1 | 290.31  | C <sub>27</sub> H <sub>29</sub> N <sub>2</sub> O <sub>6</sub> S               | (M+H) <sup>+</sup>  |
| 531.1538  | 1 | 965.32  | C <sub>27</sub> H <sub>28</sub> N <sub>2</sub> NaO <sub>6</sub> S             | (M+Na) <sup>+</sup> |
| 532.1577  | 1 | 291.12  | C <sub>27</sub> H <sub>28</sub> N <sub>2</sub> NaO <sub>6</sub> S             | (M+Na) <sup>+</sup> |
| 533.1565  | 1 | 30.93   | C <sub>27</sub> H <sub>28</sub> N <sub>2</sub> NaO <sub>6</sub> S             | (M+Na) <sup>+</sup> |
| 547.1198  | 1 | 67.87   | C <sub>27</sub> H <sub>28</sub> KN <sub>2</sub> O <sub>6</sub> S              | (M+K) <sup>+</sup>  |
| 1017.3375 | 1 | 79.76   | C <sub>54</sub> H <sub>57</sub> N <sub>4</sub> O <sub>12</sub> S <sub>2</sub> | (2M+H) <sup>+</sup> |

--- End Of Report ---

## HRMS spectra of 1d

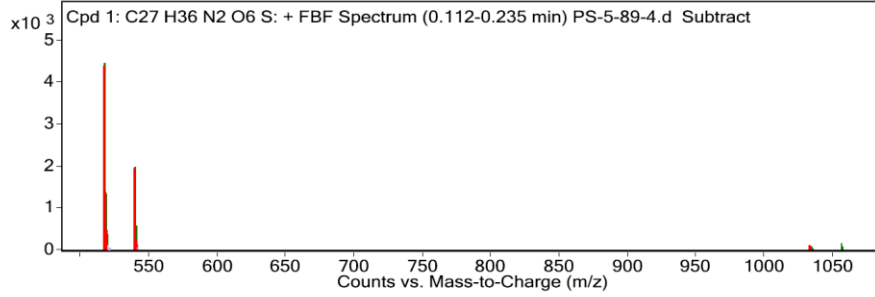

### MS Spectrum Peak List

| m/z       | z | Abund   | Formula                                                                         | Ion                  |
|-----------|---|---------|---------------------------------------------------------------------------------|----------------------|
| 517.2355  | 1 | 4447.79 | C <sub>27</sub> H <sub>37</sub> N <sub>2</sub> O <sub>6</sub> S                 | (M+H) <sup>+</sup>   |
| 518.2377  | 1 | 1358.69 | C <sub>27</sub> H <sub>37</sub> N <sub>2</sub> O <sub>6</sub> S                 | (M+H) <sup>+</sup>   |
| 519.2376  | 1 | 410.22  | C <sub>27</sub> H <sub>37</sub> N <sub>2</sub> O <sub>6</sub> S                 | (M+H) <sup>+</sup>   |
| 539.217   | 1 | 1988.83 | C <sub>27</sub> H <sub>36</sub> N <sub>2</sub> NaO <sub>6</sub> S               | (M+Na) <sup>+</sup>  |
| 540.2202  | 1 | 613.62  | C <sub>27</sub> H <sub>36</sub> N <sub>2</sub> NaO <sub>6</sub> S               | (M+Na) <sup>+</sup>  |
| 541.2178  | 1 | 153.67  | C <sub>27</sub> H <sub>36</sub> N <sub>2</sub> NaO <sub>6</sub> S               | (M+Na) <sup>+</sup>  |
| 1033.4607 | 1 | 118.26  | C <sub>54</sub> H <sub>73</sub> N <sub>4</sub> O <sub>12</sub> S <sub>2</sub>   | (2M+H) <sup>+</sup>  |
| 1034.4656 | 1 | 64.81   | C <sub>54</sub> H <sub>73</sub> N <sub>4</sub> O <sub>12</sub> S <sub>2</sub>   | (2M+H) <sup>+</sup>  |
| 1055.442  | 1 | 188.55  | C <sub>54</sub> H <sub>72</sub> N <sub>4</sub> NaO <sub>12</sub> S <sub>2</sub> | (2M+Na) <sup>+</sup> |
| 1056.4472 | 1 | 107.43  | C <sub>54</sub> H <sub>72</sub> N <sub>4</sub> NaO <sub>12</sub> S <sub>2</sub> | (2M+Na) <sup>+</sup> |

--- End Of Report ---

## HRMS spectra of 1e

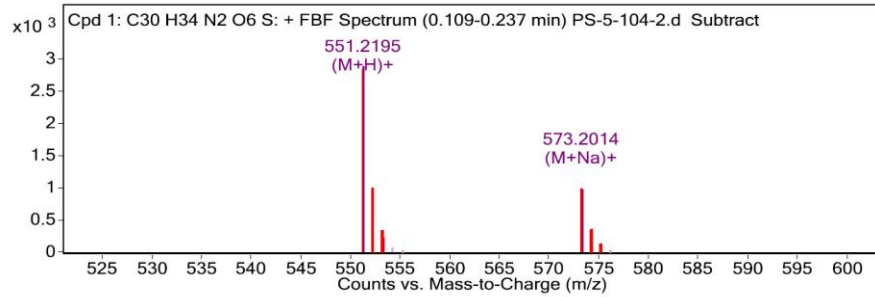

### MS Spectrum Peak List

| m/z      | z | Abund   | Formula                                                           | Ion                 |
|----------|---|---------|-------------------------------------------------------------------|---------------------|
| 551.2195 | 1 | 2890.08 | C <sub>30</sub> H <sub>35</sub> N <sub>2</sub> O <sub>6</sub> S   | (M+H) <sup>+</sup>  |
| 552.2227 | 1 | 1020.49 | C <sub>30</sub> H <sub>35</sub> N <sub>2</sub> O <sub>6</sub> S   | (M+H) <sup>+</sup>  |
| 553.2221 | 1 | 244.34  | C <sub>30</sub> H <sub>35</sub> N <sub>2</sub> O <sub>6</sub> S   | (M+H) <sup>+</sup>  |
| 573.2014 | 1 | 1004.49 | C <sub>30</sub> H <sub>34</sub> N <sub>2</sub> NaO <sub>6</sub> S | (M+Na) <sup>+</sup> |
| 574.2041 | 1 | 372.53  | C <sub>30</sub> H <sub>34</sub> N <sub>2</sub> NaO <sub>6</sub> S | (M+Na) <sup>+</sup> |
| 575.2039 | 1 | 57.92   | C <sub>30</sub> H <sub>34</sub> N <sub>2</sub> NaO <sub>6</sub> S | (M+Na) <sup>+</sup> |

--- End Of Report ---

## HRMS spectra of 1f

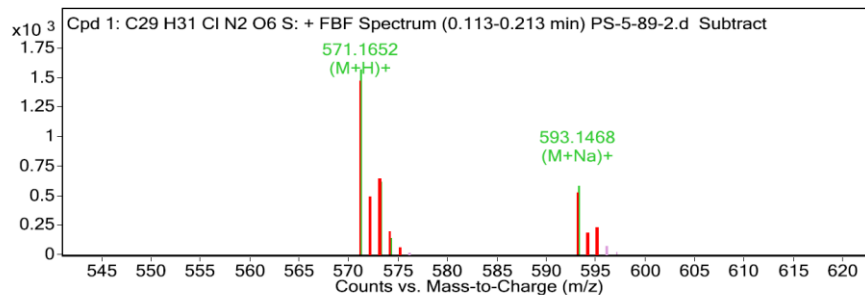

### MS Spectrum Peak List

| m/z      | z | Abund   | Formula                                                             | Ion                 |
|----------|---|---------|---------------------------------------------------------------------|---------------------|
| 571.1652 | 1 | 1568.21 | C <sub>29</sub> H <sub>32</sub> ClN <sub>2</sub> O <sub>6</sub> S   | (M+H) <sup>+</sup>  |
| 572.1686 | 1 | 474.51  | C <sub>29</sub> H <sub>32</sub> ClN <sub>2</sub> O <sub>6</sub> S   | (M+H) <sup>+</sup>  |
| 573.1635 | 1 | 629.57  | C <sub>29</sub> H <sub>32</sub> ClN <sub>2</sub> O <sub>6</sub> S   | (M+H) <sup>+</sup>  |
| 574.1641 | 1 | 148.2   | C <sub>29</sub> H <sub>32</sub> ClN <sub>2</sub> O <sub>6</sub> S   | (M+H) <sup>+</sup>  |
| 575.1581 | 1 | 22.59   | C <sub>29</sub> H <sub>32</sub> ClN <sub>2</sub> O <sub>6</sub> S   | (M+H) <sup>+</sup>  |
| 593.1468 | 1 | 585.31  | C <sub>29</sub> H <sub>31</sub> ClN <sub>2</sub> NaO <sub>6</sub> S | (M+Na) <sup>+</sup> |
| 594.1481 | 1 | 163.69  | C <sub>29</sub> H <sub>31</sub> ClN <sub>2</sub> NaO <sub>6</sub> S | (M+Na) <sup>+</sup> |
| 595.1448 | 1 | 182.49  | C <sub>29</sub> H <sub>31</sub> ClN <sub>2</sub> NaO <sub>6</sub> S | (M+Na) <sup>+</sup> |

--- End Of Report ---

## HRMS spectra of 1g

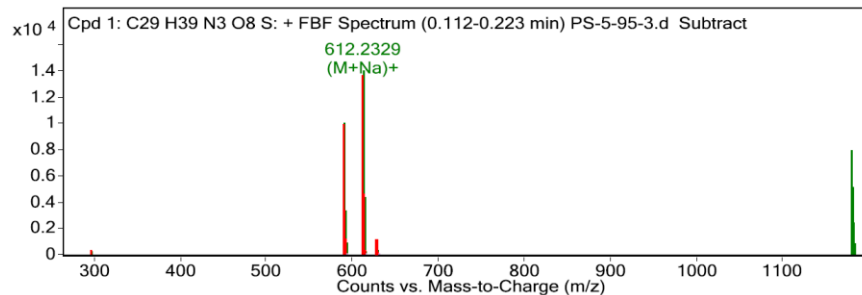

### MS Spectrum Peak List

| m/z       | z | Abund    | Formula                                                                       | Ion                  |
|-----------|---|----------|-------------------------------------------------------------------------------|----------------------|
| 295.5567  | 2 | 326.82   | C <sub>29</sub> H <sub>41</sub> N <sub>3</sub> O <sub>8</sub> S               | (M+2H) <sup>2+</sup> |
| 590.2509  | 1 | 10094.98 | C <sub>29</sub> H <sub>40</sub> N <sub>3</sub> O <sub>8</sub> S               | (M+H) <sup>+</sup>   |
| 591.254   | 1 | 3431.81  | C <sub>29</sub> H <sub>40</sub> N <sub>3</sub> O <sub>8</sub> S               | (M+H) <sup>+</sup>   |
| 612.2329  | 1 | 14097.46 | C <sub>29</sub> H <sub>39</sub> N <sub>3</sub> NaO <sub>8</sub> S             | (M+Na) <sup>+</sup>  |
| 613.2357  | 1 | 4482.54  | C <sub>29</sub> H <sub>39</sub> N <sub>3</sub> NaO <sub>8</sub> S             | (M+Na) <sup>+</sup>  |
| 614.235   | 1 | 1361.39  | C <sub>29</sub> H <sub>39</sub> N <sub>3</sub> NaO <sub>8</sub> S             | (M+Na) <sup>+</sup>  |
| 628.2025  | 1 | 1126.39  | C <sub>29</sub> H <sub>39</sub> KN <sub>3</sub> O <sub>8</sub> S              | (M+K) <sup>+</sup>   |
| 1179.495  | 1 | 8017.3   | C <sub>58</sub> H <sub>79</sub> N <sub>6</sub> O <sub>16</sub> S <sub>2</sub> | (2M+H) <sup>+</sup>  |
| 1180.498  | 1 | 5193.55  | C <sub>58</sub> H <sub>79</sub> N <sub>6</sub> O <sub>16</sub> S <sub>2</sub> | (2M+H) <sup>+</sup>  |
| 1181.4986 | 1 | 2517.77  | C <sub>58</sub> H <sub>79</sub> N <sub>6</sub> O <sub>16</sub> S <sub>2</sub> | (2M+H) <sup>+</sup>  |

--- End Of Report ---

## HRMS spectra of 1h

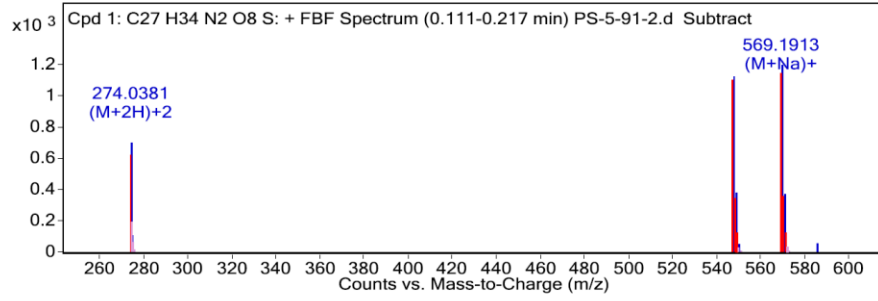

### MS Spectrum Peak List

| m/z      | z | Abund   | Formula       | Ion      |
|----------|---|---------|---------------|----------|
| 274.0381 | 2 | 705.22  | C27H36N2O8S   | (M+2H)+2 |
| 274.5394 | 2 | 114.17  | C27H36N2O8S   | (M+2H)+2 |
| 547.2094 | 1 | 1129.57 | C27H35N2O8S   | (M+H)+   |
| 548.2118 | 1 | 384     | C27H35N2O8S   | (M+H)+   |
| 549.2106 | 1 | 56.93   | C27H35N2O8S   | (M+H)+   |
| 569.1913 | 1 | 1202.22 | C27H34N2NaO8S | (M+Na)+  |
| 570.195  | 1 | 381.85  | C27H34N2NaO8S | (M+Na)+  |
| 571.1941 | 1 | 45.25   | C27H34N2NaO8S | (M+Na)+  |
| 585.1541 | 1 | 65.99   | C27H34KN2O8S  | (M+K)+   |

--- End Of Report ---

## HRMS spectra of 1i

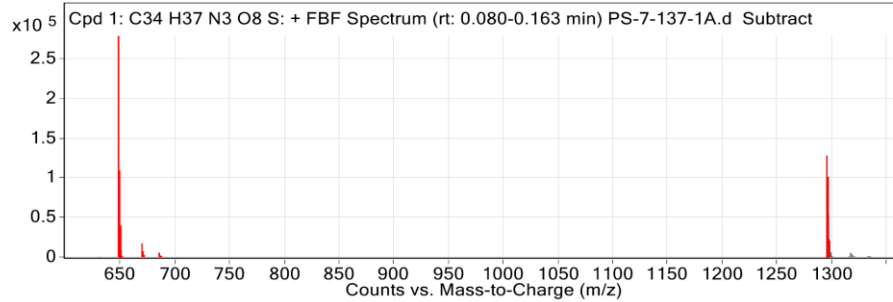

### MS Spectrum Peak List

| m/z       | z | Abund     | Formula     | Ion           |
|-----------|---|-----------|-------------|---------------|
| 630.176   | 1 | 179.22    | C34H37N3O8S | (M+H)+[-H2O]  |
| 648.236   | 1 | 278874.63 | C34H37N3O8S | (M+H)+        |
| 649.2388  | 1 | 107343.41 | C34H37N3O8S | (M+H)+        |
| 670.217   | 1 | 17149.75  | C34H37N3O8S | (M+Na)+       |
| 686.1883  | 1 | 5279.58   | C34H37N3O8S | (M+K)+        |
| 1295.4637 | 1 | 128047.95 | C34H37N3O8S | (2M+H)+       |
| 1296.4672 | 1 | 100762.45 | C34H37N3O8S | (2M+H)+       |
| 1315.4918 | 1 | 703.74    | C34H37N3O8S | (2M+K)+[-H2O] |
| 1317.4441 | 1 | 5706.52   | C34H37N3O8S | (2M+Na)+      |
| 1333.4162 | 1 | 1215.78   | C34H37N3O8S | (2M+K)+       |

--- End Of Report ---

## HRMS spectra of 1j

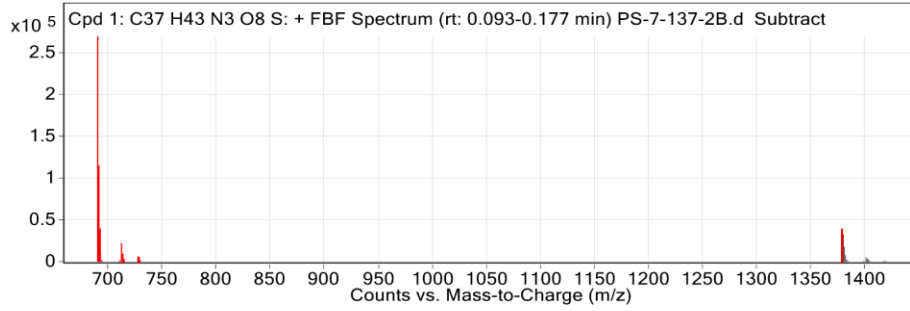

**MS Spectrum Peak List**

| m/z       | z | Abund     | Formula                                                         | Ion                        |
|-----------|---|-----------|-----------------------------------------------------------------|----------------------------|
| 690.283   | 1 | 269786.13 | C <sub>37</sub> H <sub>43</sub> N <sub>3</sub> O <sub>8</sub> S | (M+H) <sup>+</sup>         |
| 691.2856  | 1 | 112971.25 | C <sub>37</sub> H <sub>43</sub> N <sub>3</sub> O <sub>8</sub> S | (M+H) <sup>+</sup>         |
| 692.2854  | 1 | 37546.63  | C <sub>37</sub> H <sub>43</sub> N <sub>3</sub> O <sub>8</sub> S | (M+H) <sup>+</sup>         |
| 710.3115  | 1 | 1966.81   | C <sub>37</sub> H <sub>43</sub> N <sub>3</sub> O <sub>8</sub> S | (M+K)+[-H <sub>2</sub> O]  |
| 712.2636  | 1 | 22394.12  | C <sub>37</sub> H <sub>43</sub> N <sub>3</sub> O <sub>8</sub> S | (M+Na) <sup>+</sup>        |
| 728.2359  | 1 | 6018.28   | C <sub>37</sub> H <sub>43</sub> N <sub>3</sub> O <sub>8</sub> S | (M+K) <sup>+</sup>         |
| 1379.5569 | 1 | 38415.02  | C <sub>37</sub> H <sub>43</sub> N <sub>3</sub> O <sub>8</sub> S | (2M+H) <sup>+</sup>        |
| 1399.5766 | 1 | 806.01    | C <sub>37</sub> H <sub>43</sub> N <sub>3</sub> O <sub>8</sub> S | (2M+K)+[-H <sub>2</sub> O] |
| 1401.5359 | 1 | 5150.48   | C <sub>37</sub> H <sub>43</sub> N <sub>3</sub> O <sub>8</sub> S | (2M+Na) <sup>+</sup>       |
| 1417.511  | 1 | 947.69    | C <sub>37</sub> H <sub>43</sub> N <sub>3</sub> O <sub>8</sub> S | (2M+K) <sup>+</sup>        |

--- End Of Report ---

## HRMS spectra of 1

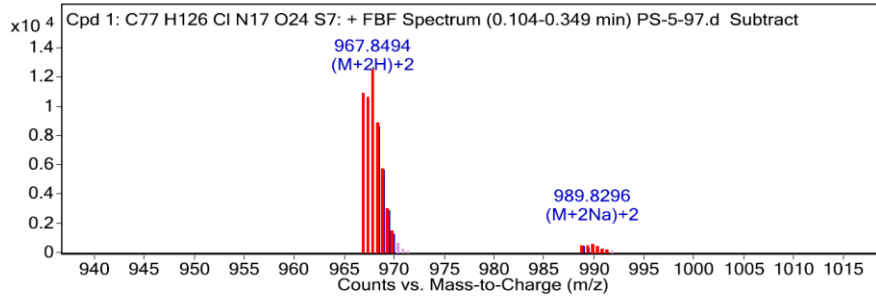

**MS Spectrum Peak List**

| m/z      | z | Abund    | Formula                                                                                           | Ion       |
|----------|---|----------|---------------------------------------------------------------------------------------------------|-----------|
| 966.849  | 2 | 10970.96 | C <sub>77</sub> H <sub>128</sub> ClN <sub>17</sub> O <sub>24</sub> S <sub>7</sub>                 | (M+2H)+2  |
| 967.3504 | 2 | 10581.76 | C <sub>77</sub> H <sub>128</sub> ClN <sub>17</sub> O <sub>24</sub> S <sub>7</sub>                 | (M+2H)+2  |
| 967.8494 | 2 | 12732.34 | C <sub>77</sub> H <sub>128</sub> ClN <sub>17</sub> O <sub>24</sub> S <sub>7</sub>                 | (M+2H)+2  |
| 968.3496 | 2 | 8657.85  | C <sub>77</sub> H <sub>128</sub> ClN <sub>17</sub> O <sub>24</sub> S <sub>7</sub>                 | (M+2H)+2  |
| 968.849  | 2 | 5717.75  | C <sub>77</sub> H <sub>128</sub> ClN <sub>17</sub> O <sub>24</sub> S <sub>7</sub>                 | (M+2H)+2  |
| 969.3486 | 2 | 2945.85  | C <sub>77</sub> H <sub>128</sub> ClN <sub>17</sub> O <sub>24</sub> S <sub>7</sub>                 | (M+2H)+2  |
| 969.8485 | 2 | 1355.23  | C <sub>77</sub> H <sub>128</sub> ClN <sub>17</sub> O <sub>24</sub> S <sub>7</sub>                 | (M+2H)+2  |
| 988.8291 | 2 | 502.26   | C <sub>77</sub> H <sub>126</sub> ClN <sub>17</sub> Na <sub>2</sub> O <sub>24</sub> S <sub>7</sub> | (M+2Na)+2 |
| 989.3307 | 2 | 413.52   | C <sub>77</sub> H <sub>126</sub> ClN <sub>17</sub> Na <sub>2</sub> O <sub>24</sub> S <sub>7</sub> | (M+2Na)+2 |
| 989.8296 | 2 | 561.39   | C <sub>77</sub> H <sub>126</sub> ClN <sub>17</sub> Na <sub>2</sub> O <sub>24</sub> S <sub>7</sub> | (M+2Na)+2 |

--- End Of Report ---



## HRMS spectra of 2

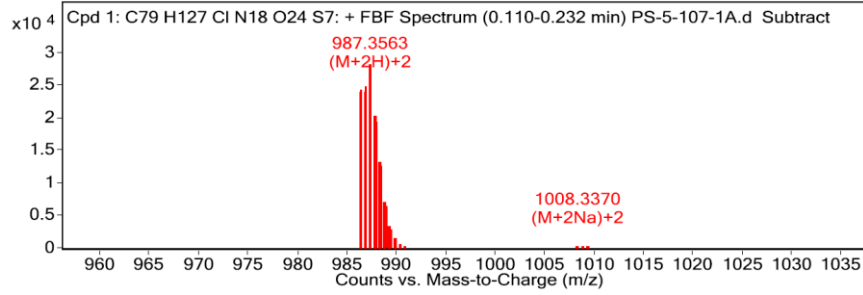

MS Spectrum Peak List

| m/z      | z | Abund    | Formula              | Ion       |
|----------|---|----------|----------------------|-----------|
| 986.3557 | 2 | 24358.23 | C79H129ClN18O24S7    | (M+2H)+2  |
| 986.8571 | 2 | 24820.71 | C79H129ClN18O24S7    | (M+2H)+2  |
| 987.3563 | 2 | 28260.01 | C79H129ClN18O24S7    | (M+2H)+2  |
| 987.8564 | 2 | 19501.39 | C79H129ClN18O24S7    | (M+2H)+2  |
| 988.3555 | 2 | 12751.56 | C79H129ClN18O24S7    | (M+2H)+2  |
| 988.8556 | 2 | 6632.99  | C79H129ClN18O24S7    | (M+2H)+2  |
| 989.3553 | 2 | 3010.12  | C79H129ClN18O24S7    | (M+2H)+2  |
| 989.8553 | 2 | 1177.02  | C79H129ClN18O24S7    | (M+2H)+2  |
| 990.3543 | 2 | 481.65   | C79H129ClN18O24S7    | (M+2H)+2  |
| 1008.337 | 2 | 140.05   | C79H127ClN18Na2O24S7 | (M+2Na)+2 |

--- End Of Report ---

## HRMS spectra of 3

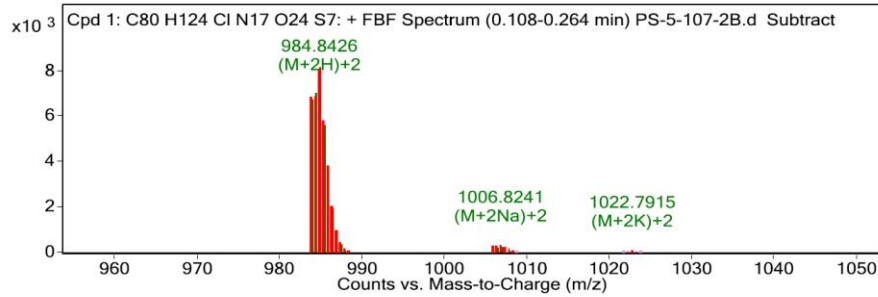

MS Spectrum Peak List

| m/z       | z | Abund   | Formula              | Ion       |
|-----------|---|---------|----------------------|-----------|
| 983.8422  | 2 | 6740.5  | C80H126ClN17O24S7    | (M+2H)+2  |
| 984.3435  | 2 | 7053.95 | C80H126ClN17O24S7    | (M+2H)+2  |
| 984.8426  | 2 | 8184.98 | C80H126ClN17O24S7    | (M+2H)+2  |
| 985.3428  | 2 | 5613.13 | C80H126ClN17O24S7    | (M+2H)+2  |
| 985.8425  | 2 | 3663.93 | C80H126ClN17O24S7    | (M+2H)+2  |
| 986.3428  | 2 | 1977.39 | C80H126ClN17O24S7    | (M+2H)+2  |
| 986.8415  | 2 | 949.15  | C80H126ClN17O24S7    | (M+2H)+2  |
| 987.3431  | 2 | 390.48  | C80H126ClN17O24S7    | (M+2H)+2  |
| 1005.8222 | 2 | 270.46  | C80H124ClN17Na2O24S7 | (M+2Na)+2 |
| 1022.7915 | 2 | 65.45   | C80H124ClK2N17O24S7  | (M+2K)+2  |

--- End Of Report ---

## HRMS spectra of 4

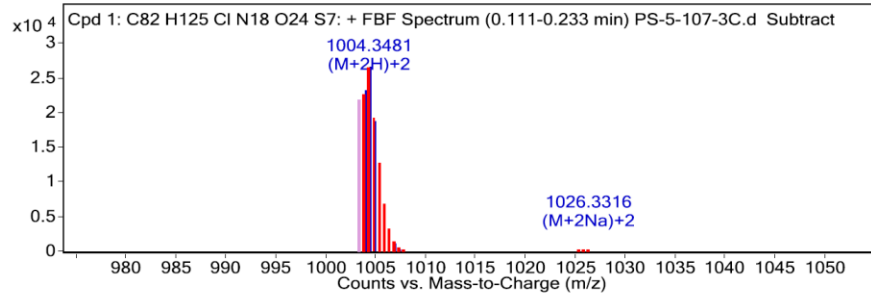

MS Spectrum Peak List

| m/z       | z | Abund    | Formula              | Ion       |
|-----------|---|----------|----------------------|-----------|
| 1003.8485 | 2 | 23340.62 | C82H127ClN18O24S7    | (M+2H)+2  |
| 1004.3481 | 2 | 26718.61 | C82H127ClN18O24S7    | (M+2H)+2  |
| 1004.8482 | 2 | 18850.31 | C82H127ClN18O24S7    | (M+2H)+2  |
| 1005.3475 | 2 | 12182.81 | C82H127ClN18O24S7    | (M+2H)+2  |
| 1005.8475 | 2 | 6510.62  | C82H127ClN18O24S7    | (M+2H)+2  |
| 1006.3471 | 2 | 2962.8   | C82H127ClN18O24S7    | (M+2H)+2  |
| 1006.8467 | 2 | 1308.35  | C82H127ClN18O24S7    | (M+2H)+2  |
| 1007.3467 | 2 | 481.44   | C82H127ClN18O24S7    | (M+2H)+2  |
| 1025.3265 | 2 | 117.69   | C82H125ClN18Na2O24S7 | (M+2Na)+2 |
| 1026.3316 | 2 | 145.25   | C82H125ClN18Na2O24S7 | (M+2Na)+2 |

--- End Of Report ---

## HRMS spectra of 5

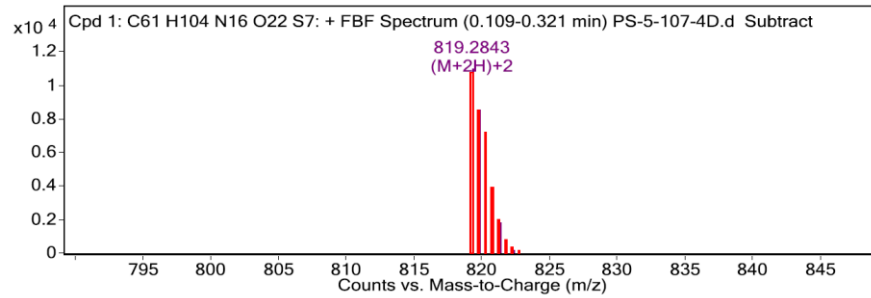

MS Spectrum Peak List

| m/z      | z | Abund    | Formula         | Ion      |
|----------|---|----------|-----------------|----------|
| 819.2843 | 2 | 11062.34 | C61H106N16O22S7 | (M+2H)+2 |
| 819.7855 | 2 | 8579.07  | C61H106N16O22S7 | (M+2H)+2 |
| 820.2846 | 2 | 6986.26  | C61H106N16O22S7 | (M+2H)+2 |
| 820.7845 | 2 | 3902.19  | C61H106N16O22S7 | (M+2H)+2 |
| 821.2841 | 2 | 1947.75  | C61H106N16O22S7 | (M+2H)+2 |
| 821.7839 | 2 | 760.61   | C61H106N16O22S7 | (M+2H)+2 |
| 822.2832 | 2 | 284.88   | C61H106N16O22S7 | (M+2H)+2 |
| 822.782  | 2 | 79.1     | C61H106N16O22S7 | (M+2H)+2 |

--- End Of Report ---

## HRMS spectra of 6

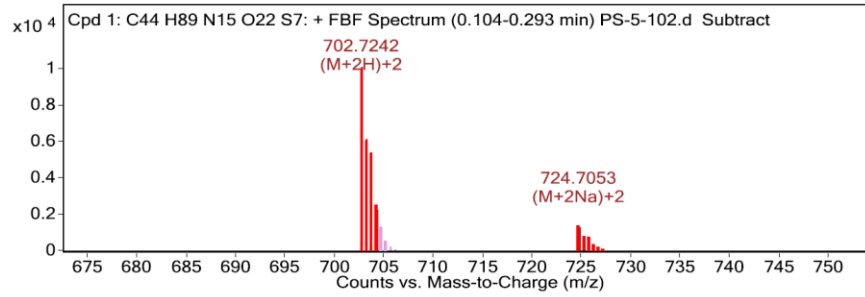

### MS Spectrum Peak List

| <i>m/z</i> | <i>z</i> | Abund    | Formula           | Ion       |
|------------|----------|----------|-------------------|-----------|
| 702.7242   | 2        | 10162.73 | C44H91N15O22S7    | (M+2H)+2  |
| 703.2252   | 2        | 6169.12  | C44H91N15O22S7    | (M+2H)+2  |
| 703.7242   | 2        | 5215.91  | C44H91N15O22S7    | (M+2H)+2  |
| 704.2244   | 2        | 2309.95  | C44H91N15O22S7    | (M+2H)+2  |
| 724.7053   | 2        | 1342.12  | C44H89N15Na2O22S7 | (M+2Na)+2 |
| 725.2065   | 2        | 849.6    | C44H89N15Na2O22S7 | (M+2Na)+2 |
| 725.7046   | 2        | 728.89   | C44H89N15Na2O22S7 | (M+2Na)+2 |
| 726.2048   | 2        | 294.39   | C44H89N15Na2O22S7 | (M+2Na)+2 |
| 726.7051   | 2        | 127.69   | C44H89N15Na2O22S7 | (M+2Na)+2 |
| 727.2028   | 2        | 29.15    | C44H89N15Na2O22S7 | (M+2Na)+2 |

--- End Of Report ---

## HRMS spectra of 1-FITC

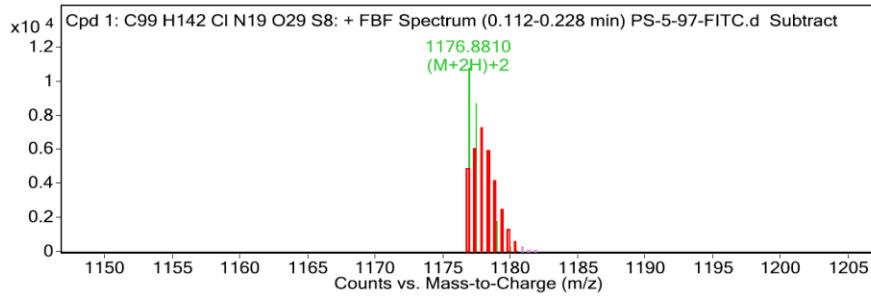

### MS Spectrum Peak List

| <i>m/z</i> | <i>z</i> | Abund    | Formula           | Ion      |
|------------|----------|----------|-------------------|----------|
| 1176.881   | 2        | 10861.65 | C99H144ClN19O29S8 | (M+2H)+2 |
| 1177.3815  | 2        | 8735.57  | C99H144ClN19O29S8 | (M+2H)+2 |
| 1177.8808  | 2        | 6133.46  | C99H144ClN19O29S8 | (M+2H)+2 |
| 1178.3807  | 2        | 3570.78  | C99H144ClN19O29S8 | (M+2H)+2 |
| 1178.8809  | 2        | 1910.52  | C99H144ClN19O29S8 | (M+2H)+2 |
| 1179.3798  | 2        | 856.76   | C99H144ClN19O29S8 | (M+2H)+2 |
| 1179.8785  | 2        | 366.92   | C99H144ClN19O29S8 | (M+2H)+2 |
| 1180.3788  | 2        | 134.07   | C99H144ClN19O29S8 | (M+2H)+2 |

--- End Of Report ---

## HRMS spectra of 2-FITC

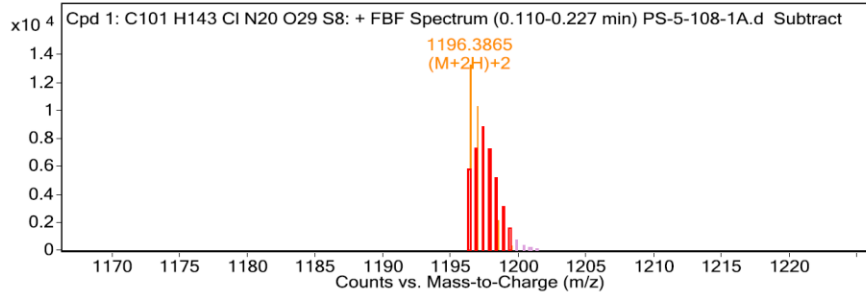

**MS Spectrum Peak List**

| m/z       | z | Abund    | Formula            | Ion      |
|-----------|---|----------|--------------------|----------|
| 1196.3865 | 2 | 13316.92 | C101H145ClN20O29S8 | (M+2H)+2 |
| 1196.8869 | 2 | 10396.94 | C101H145ClN20O29S8 | (M+2H)+2 |
| 1197.387  | 2 | 7434.07  | C101H145ClN20O29S8 | (M+2H)+2 |
| 1197.8868 | 2 | 4156.46  | C101H145ClN20O29S8 | (M+2H)+2 |
| 1198.386  | 2 | 2234.87  | C101H145ClN20O29S8 | (M+2H)+2 |
| 1198.885  | 2 | 1041.17  | C101H145ClN20O29S8 | (M+2H)+2 |
| 1199.3857 | 2 | 432.68   | C101H145ClN20O29S8 | (M+2H)+2 |

--- End Of Report ---

## HRMS spectra of 3-FITC

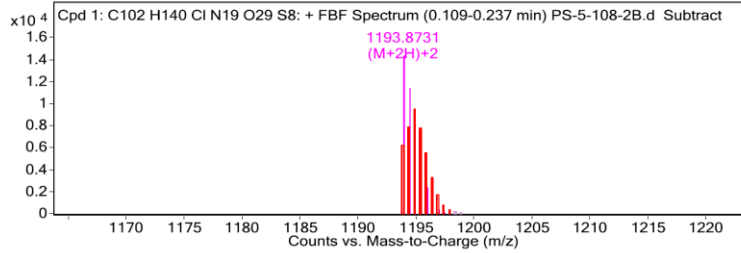

**MS Spectrum Peak List**

| m/z       | z | Abund    | Formula            | Ion      |
|-----------|---|----------|--------------------|----------|
| 1193.8731 | 2 | 14409.95 | C102H142ClN19O29S8 | (M+2H)+2 |
| 1194.3732 | 2 | 11427.2  | C102H142ClN19O29S8 | (M+2H)+2 |
| 1194.8729 | 2 | 7915.61  | C102H142ClN19O29S8 | (M+2H)+2 |
| 1195.3725 | 2 | 4890.26  | C102H142ClN19O29S8 | (M+2H)+2 |
| 1195.8723 | 2 | 2459.77  | C102H142ClN19O29S8 | (M+2H)+2 |
| 1196.372  | 2 | 1077.29  | C102H142ClN19O29S8 | (M+2H)+2 |
| 1196.8731 | 2 | 524.97   | C102H142ClN19O29S8 | (M+2H)+2 |
| 1197.3721 | 2 | 153.16   | C102H142ClN19O29S8 | (M+2H)+2 |
| 1197.8741 | 2 | 27.78    | C102H142ClN19O29S8 | (M+2H)+2 |

--- End Of Report ---

## HRMS spectra of 4-FITC

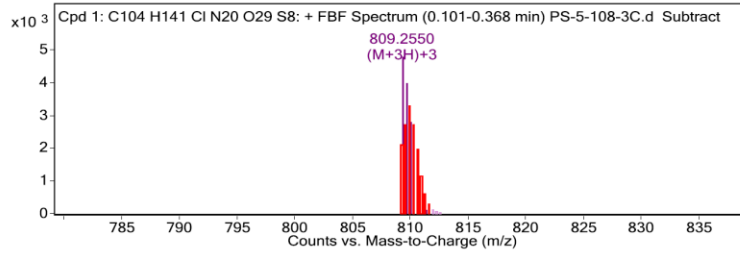

**MS Spectrum Peak List**

| m/z      | z | Abund   | Formula            | Ion      |
|----------|---|---------|--------------------|----------|
| 809.255  | 3 | 4817.22 | C104H144ClN20O29S8 | (M+3H)+3 |
| 809.5885 | 3 | 4011.91 | C104H144ClN20O29S8 | (M+3H)+3 |
| 809.9217 | 3 | 2813.06 | C104H144ClN20O29S8 | (M+3H)+3 |
| 810.2548 | 3 | 1670.02 | C104H144ClN20O29S8 | (M+3H)+3 |
| 810.5885 | 3 | 876.2   | C104H144ClN20O29S8 | (M+3H)+3 |
| 810.9207 | 3 | 422.02  | C104H144ClN20O29S8 | (M+3H)+3 |
| 811.2533 | 3 | 143.89  | C104H144ClN20O29S8 | (M+3H)+3 |
| 811.5848 | 3 | 54.35   | C104H144ClN20O29S8 | (M+3H)+3 |

--- End Of Report ---

## HRMS spectra of 5-FITC

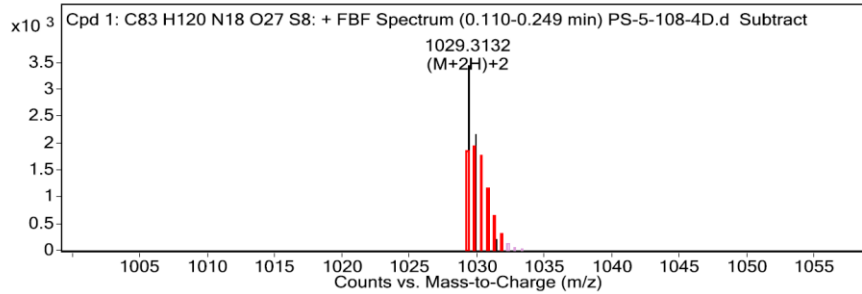

**MS Spectrum Peak List**

| m/z       | z | Abund   | Formula         | Ion      |
|-----------|---|---------|-----------------|----------|
| 1029.3132 | 2 | 3449.52 | C83H122N18O27S8 | (M+2H)+2 |
| 1029.8132 | 2 | 2189.28 | C83H122N18O27S8 | (M+2H)+2 |
| 1030.3134 | 2 | 1153.83 | C83H122N18O27S8 | (M+2H)+2 |
| 1030.8125 | 2 | 554.84  | C83H122N18O27S8 | (M+2H)+2 |
| 1031.3132 | 2 | 232.76  | C83H122N18O27S8 | (M+2H)+2 |
| 1031.809  | 2 | 74.75   | C83H122N18O27S8 | (M+2H)+2 |

--- End Of Report ---

## HRMS spectra of 6-FITC

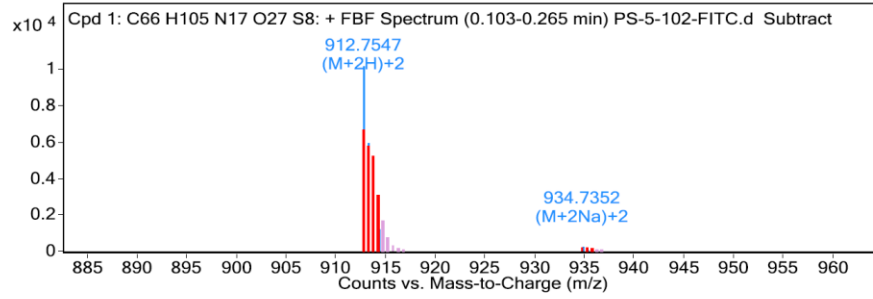

### MS Spectrum Peak List

| m/z      | z | Abund    | Formula            | Ion       |
|----------|---|----------|--------------------|-----------|
| 912.7547 | 2 | 10222.49 | C66H107N17O27S8    | (M+2H)+2  |
| 913.2544 | 2 | 5983.9   | C66H107N17O27S8    | (M+2H)+2  |
| 913.7537 | 2 | 3049.32  | C66H107N17O27S8    | (M+2H)+2  |
| 914.2537 | 2 | 1313.44  | C66H107N17O27S8    | (M+2H)+2  |
| 934.7352 | 2 | 278.5    | C66H105N17Na2O27S8 | (M+2Na)+2 |
| 935.2348 | 2 | 139.58   | C66H105N17Na2O27S8 | (M+2Na)+2 |
| 935.7305 | 2 | 51.55    | C66H105N17Na2O27S8 | (M+2Na)+2 |

--- End Of Report ---

## 6. The $^1\text{H}$ and $^{13}\text{C}$ NMR Spectra of D-Sulfony- $\gamma$ -Aapeptide Building Blocks 1a-j

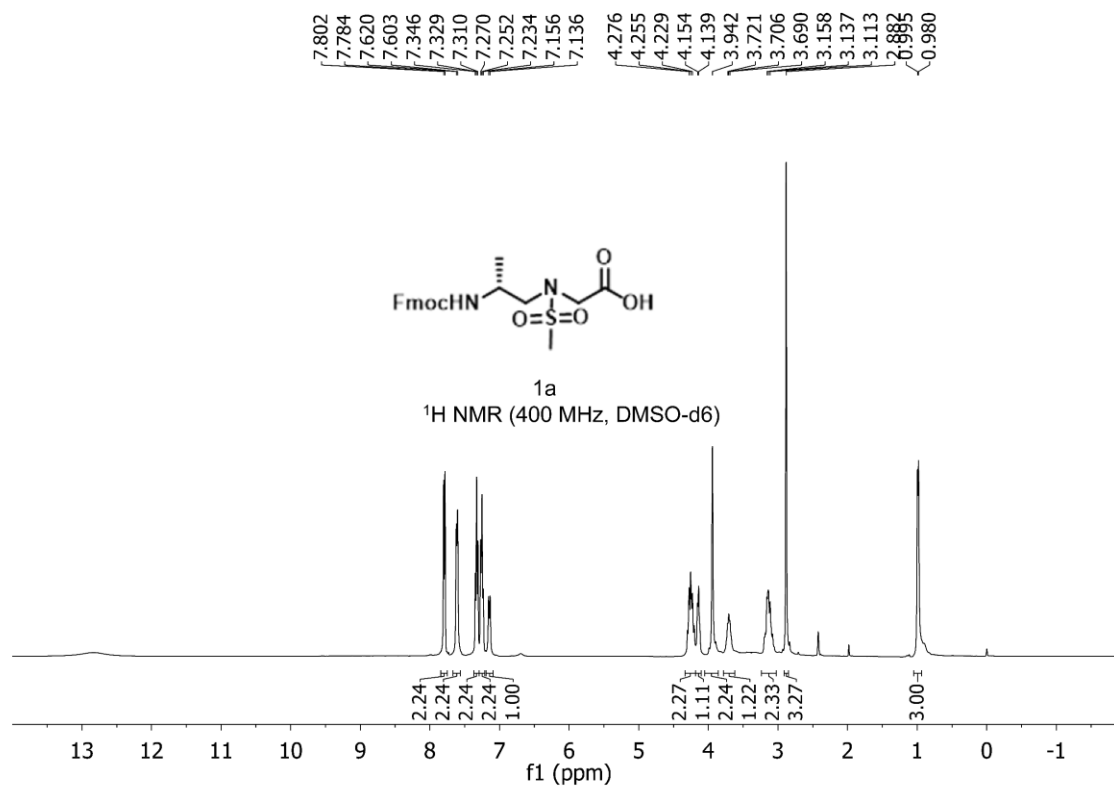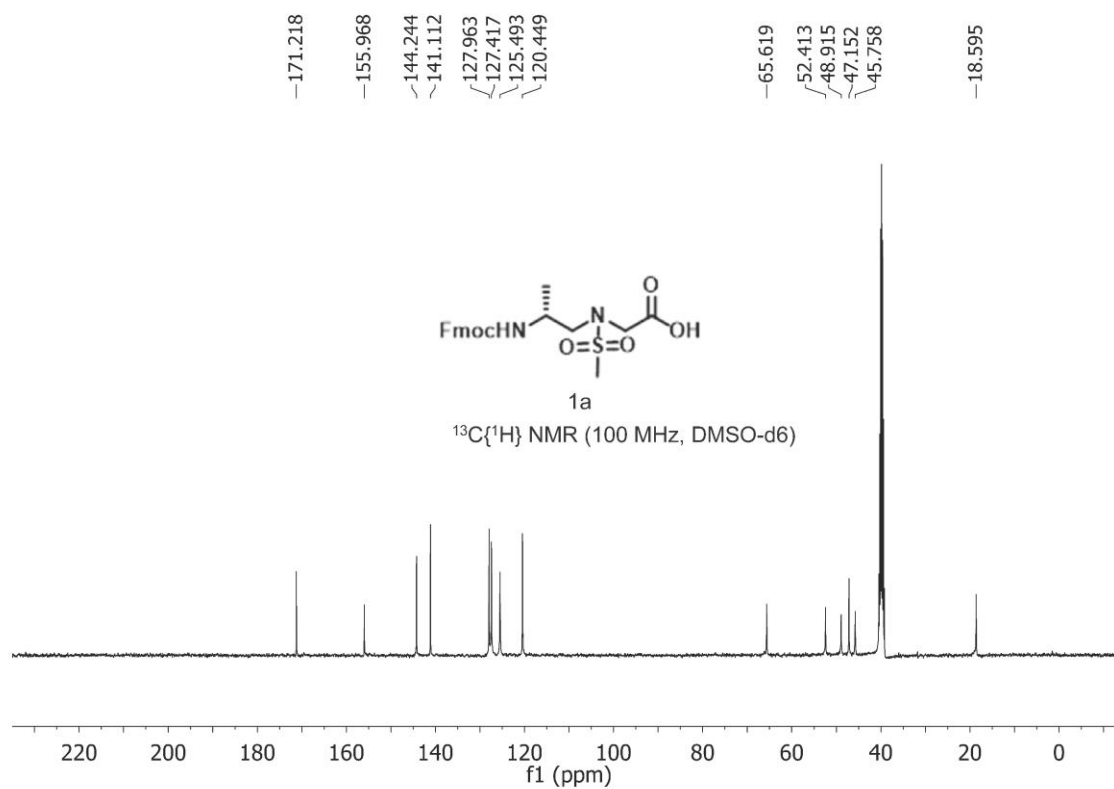

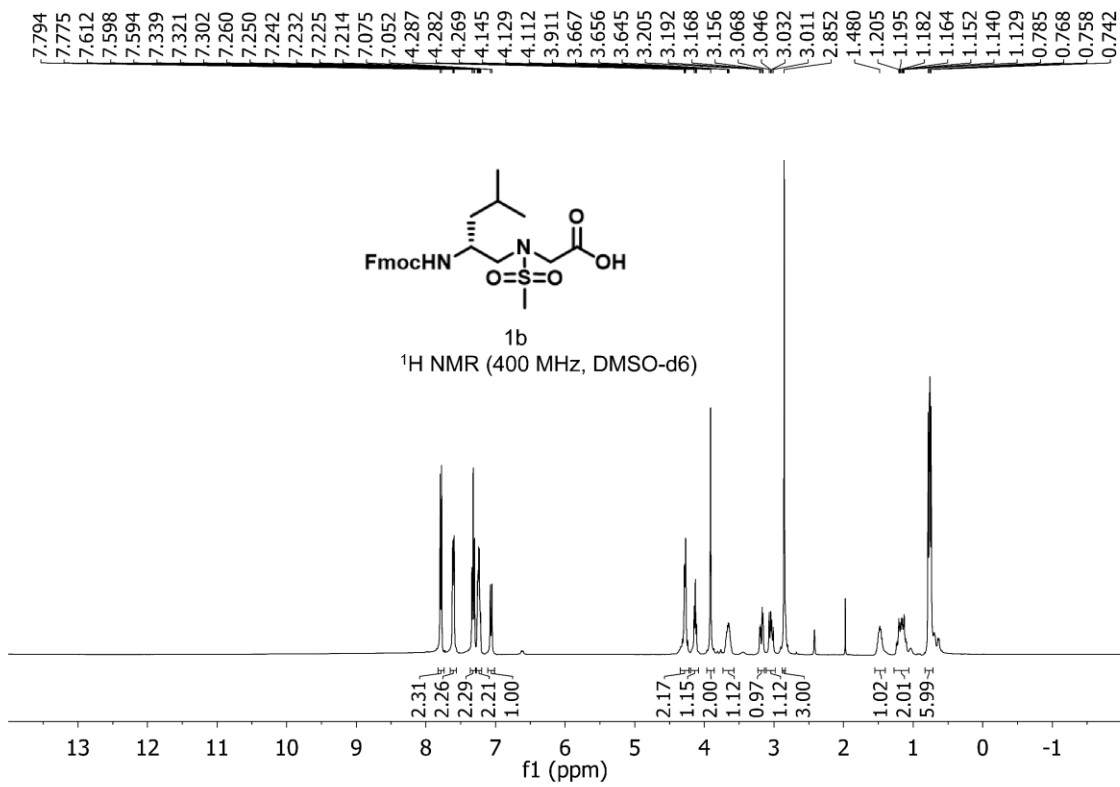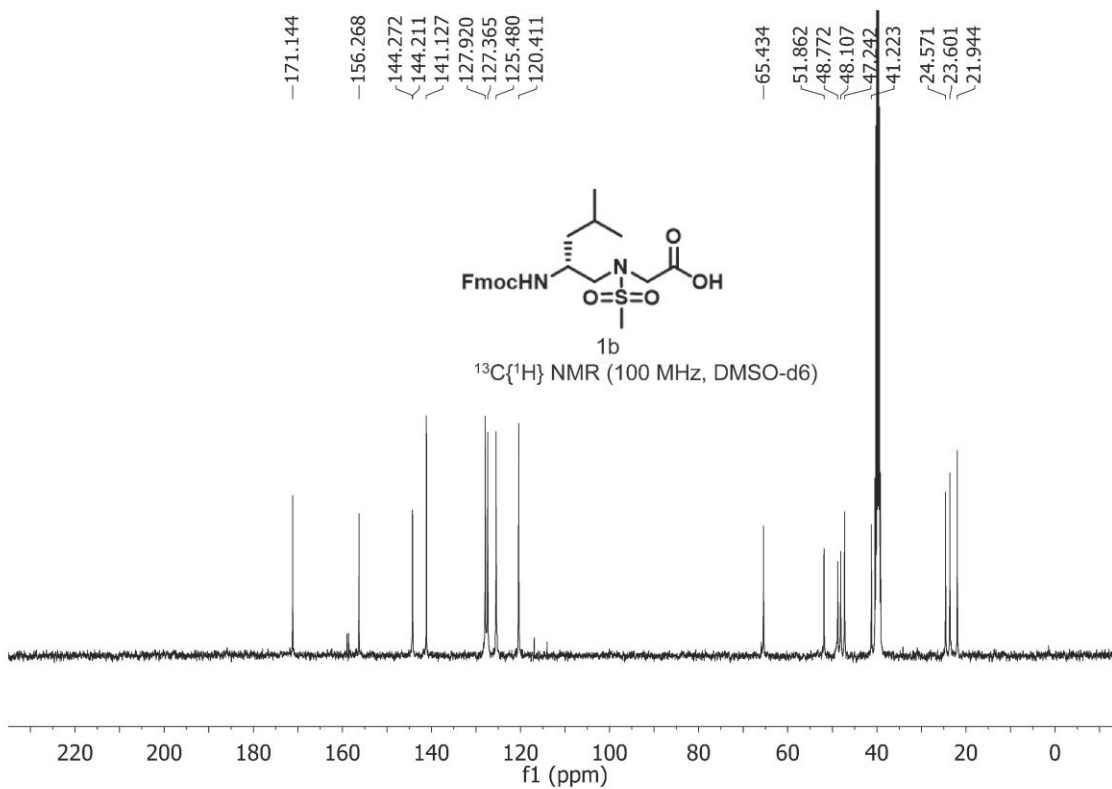



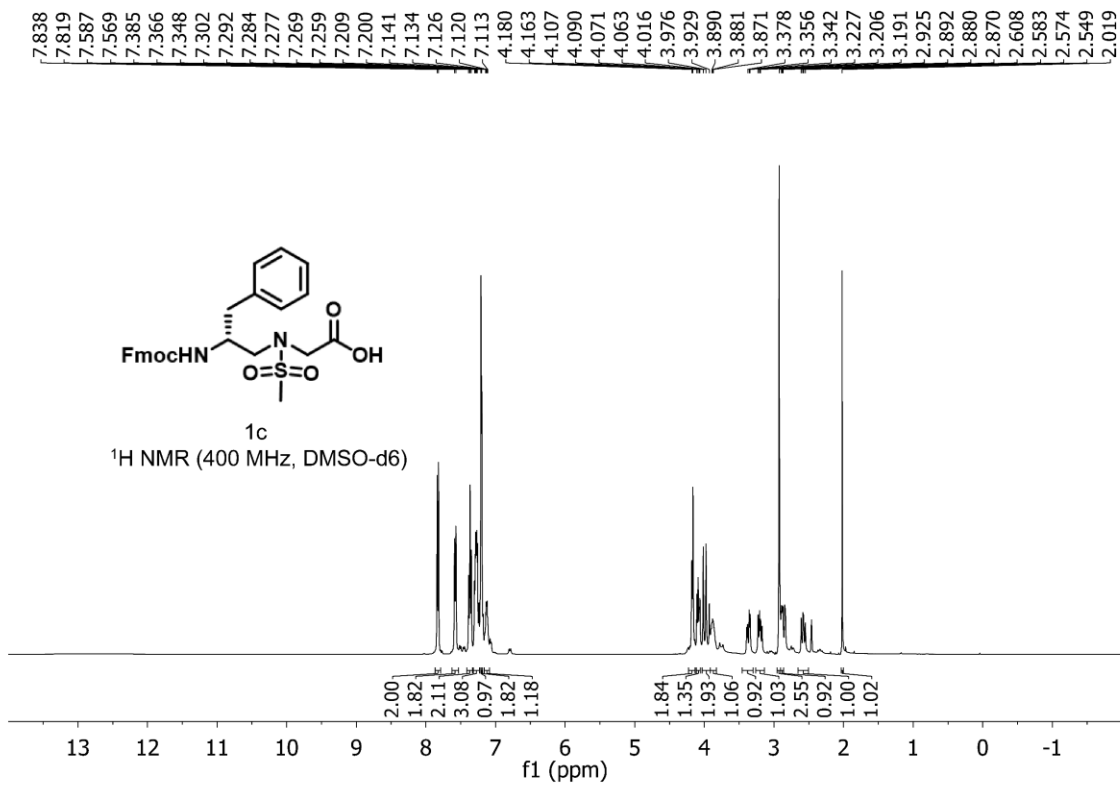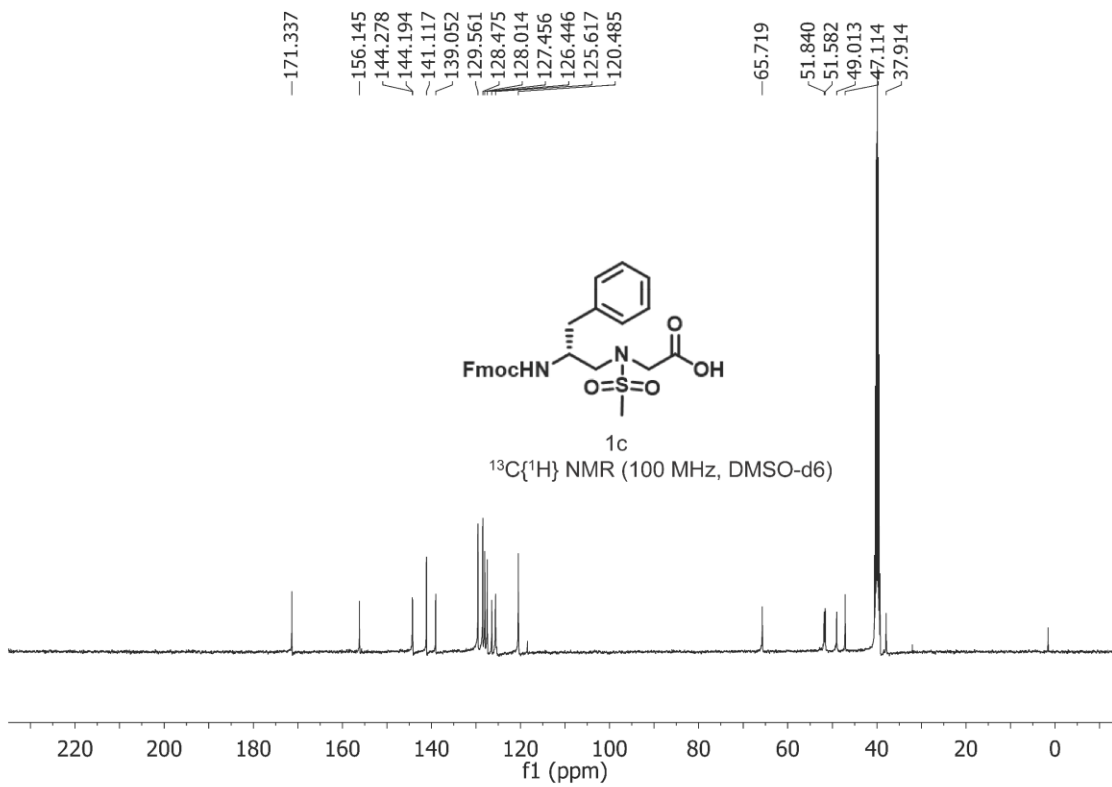

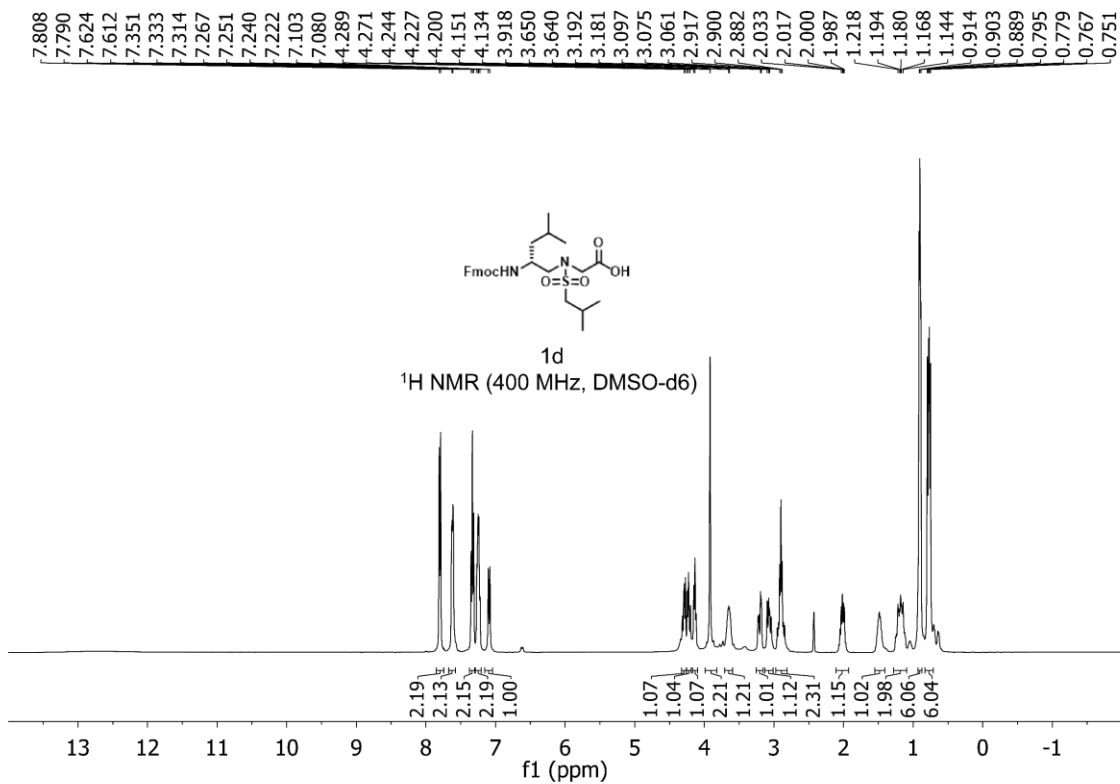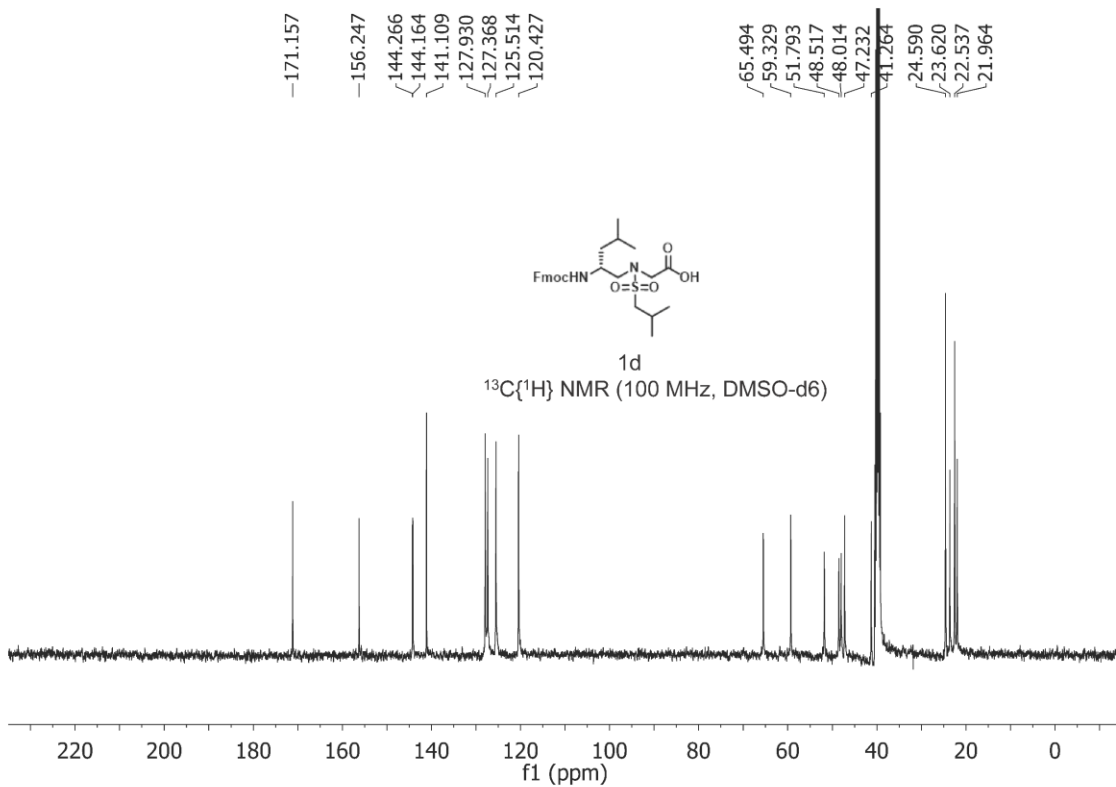

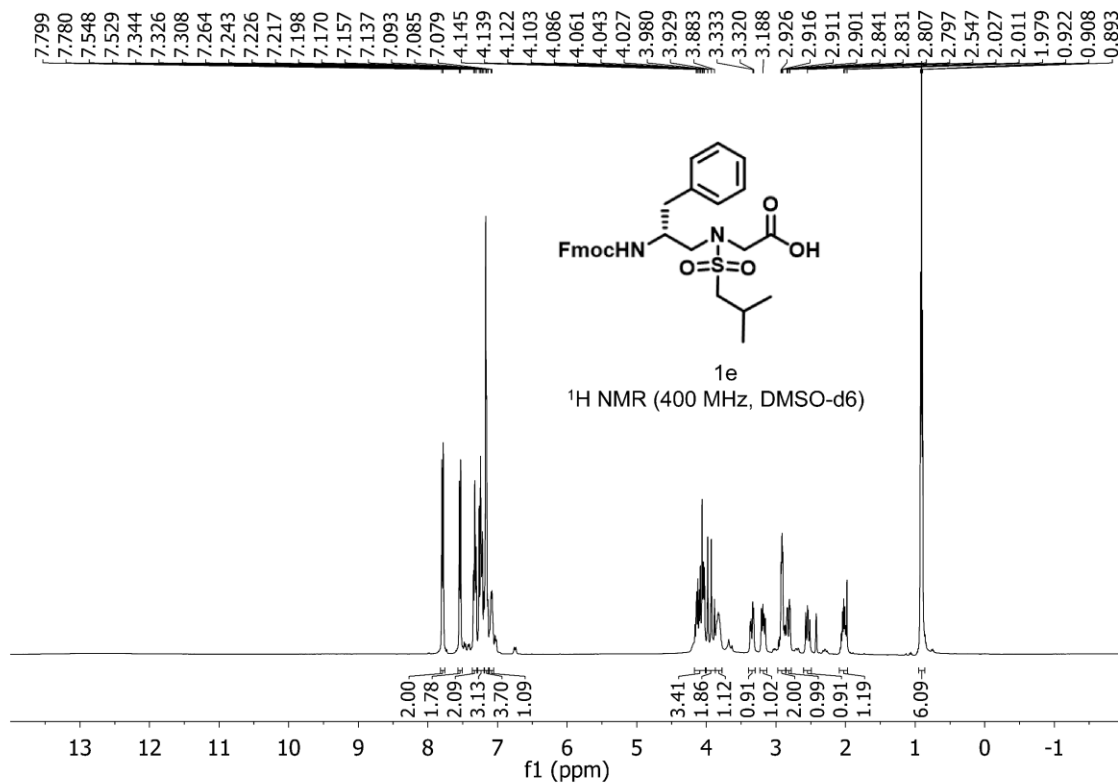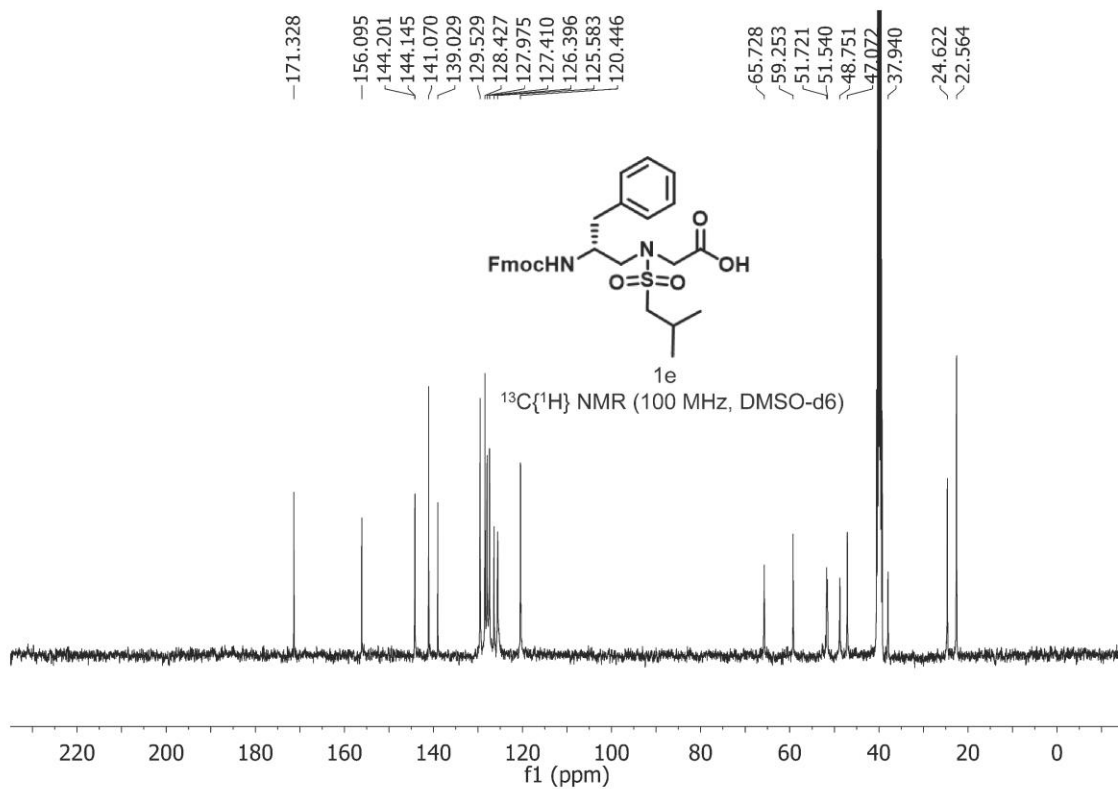

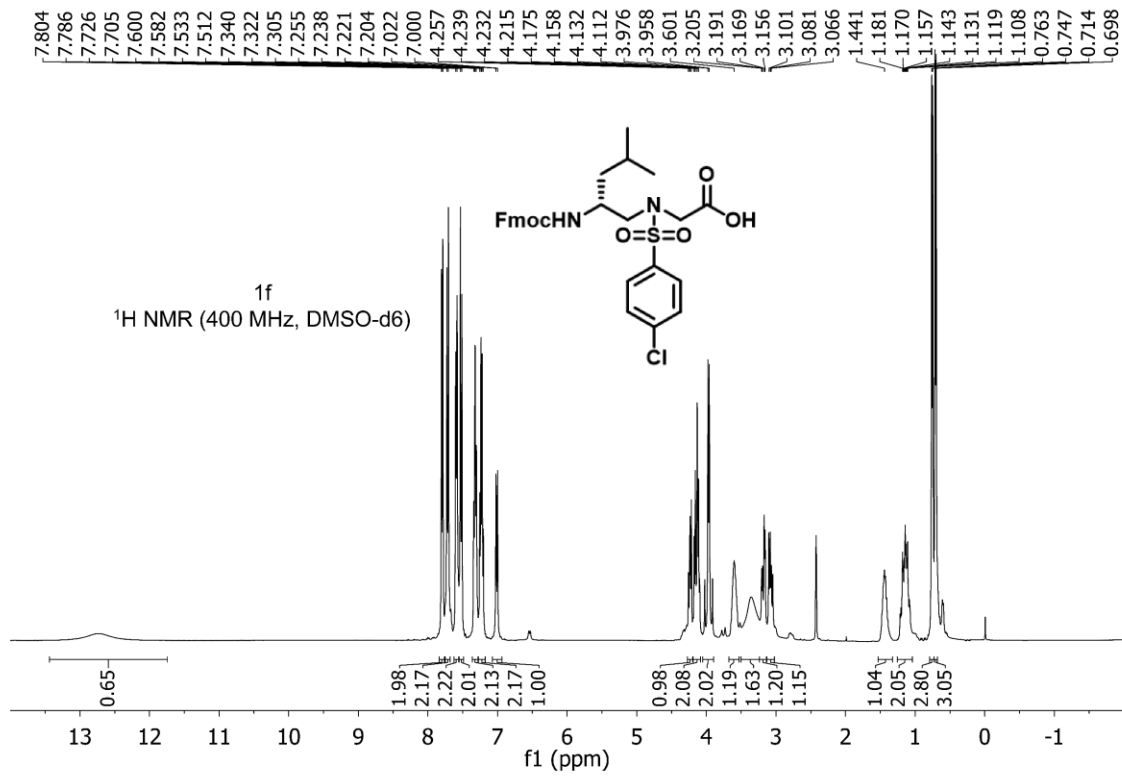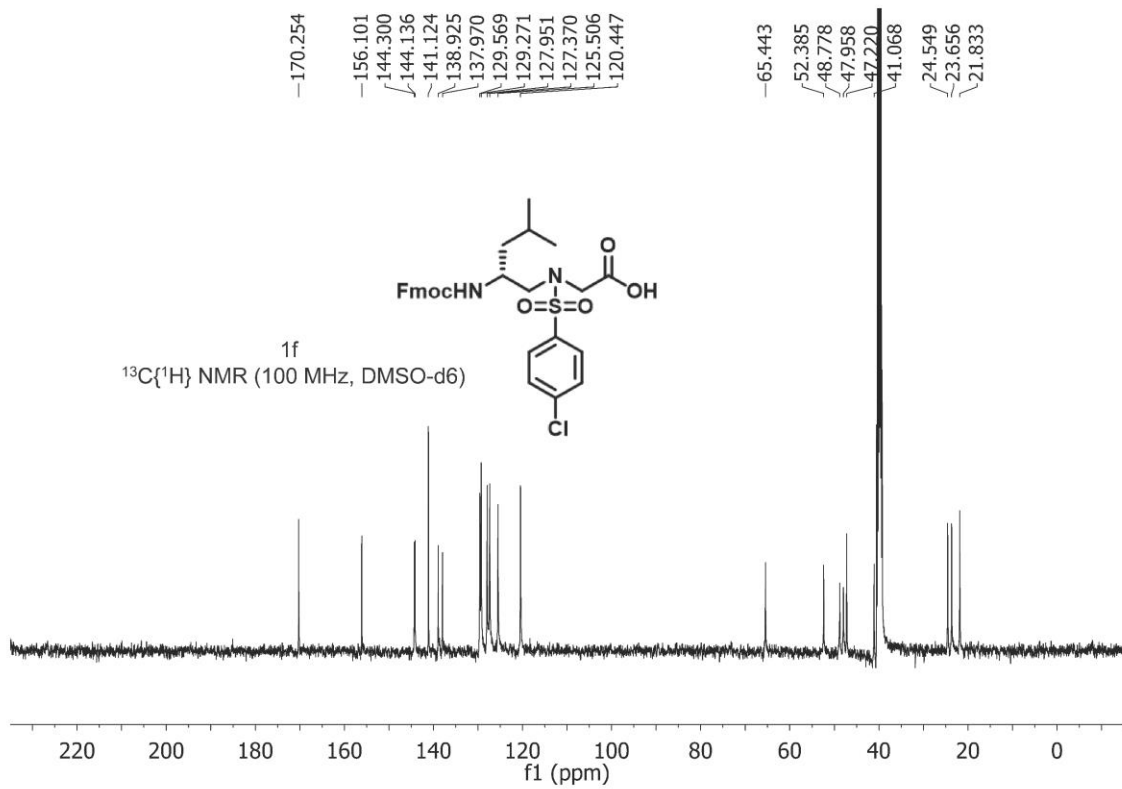

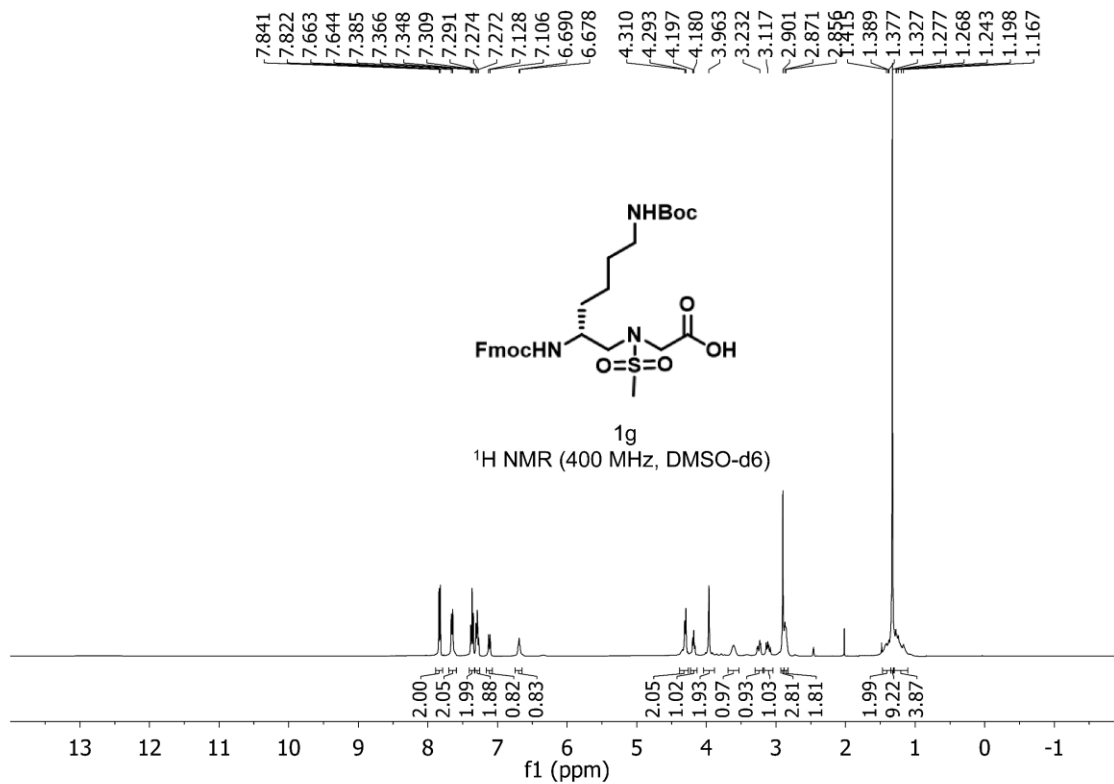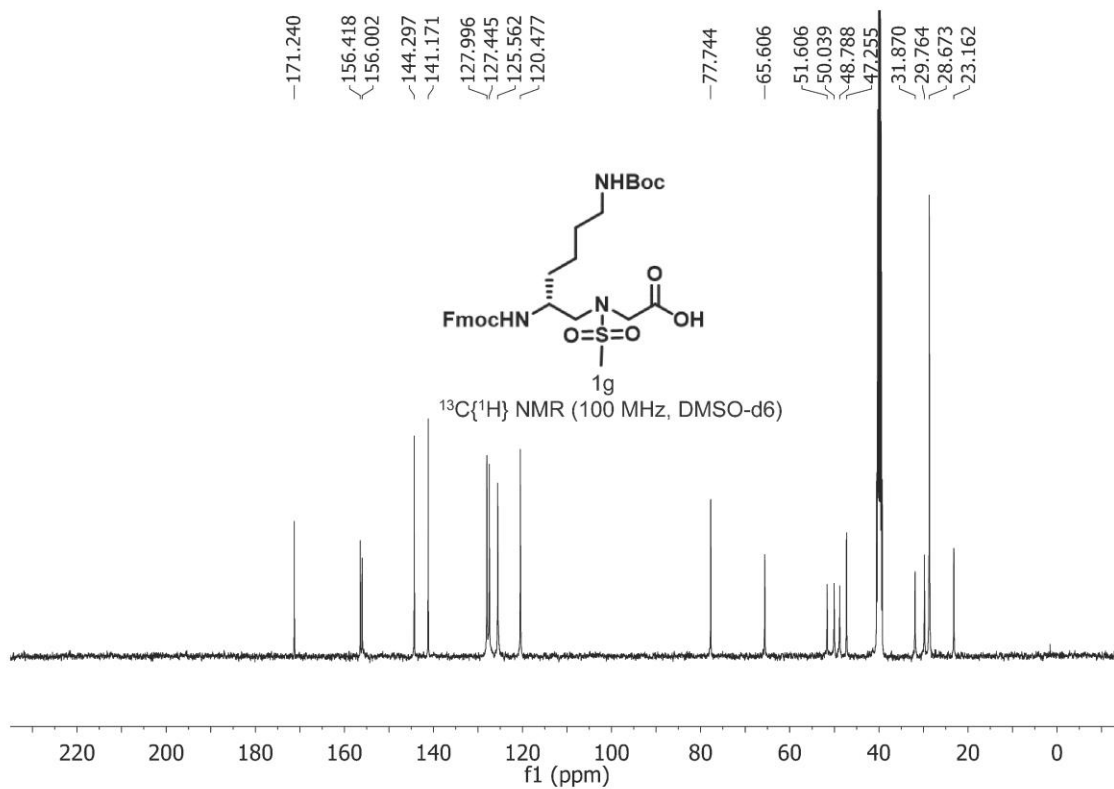

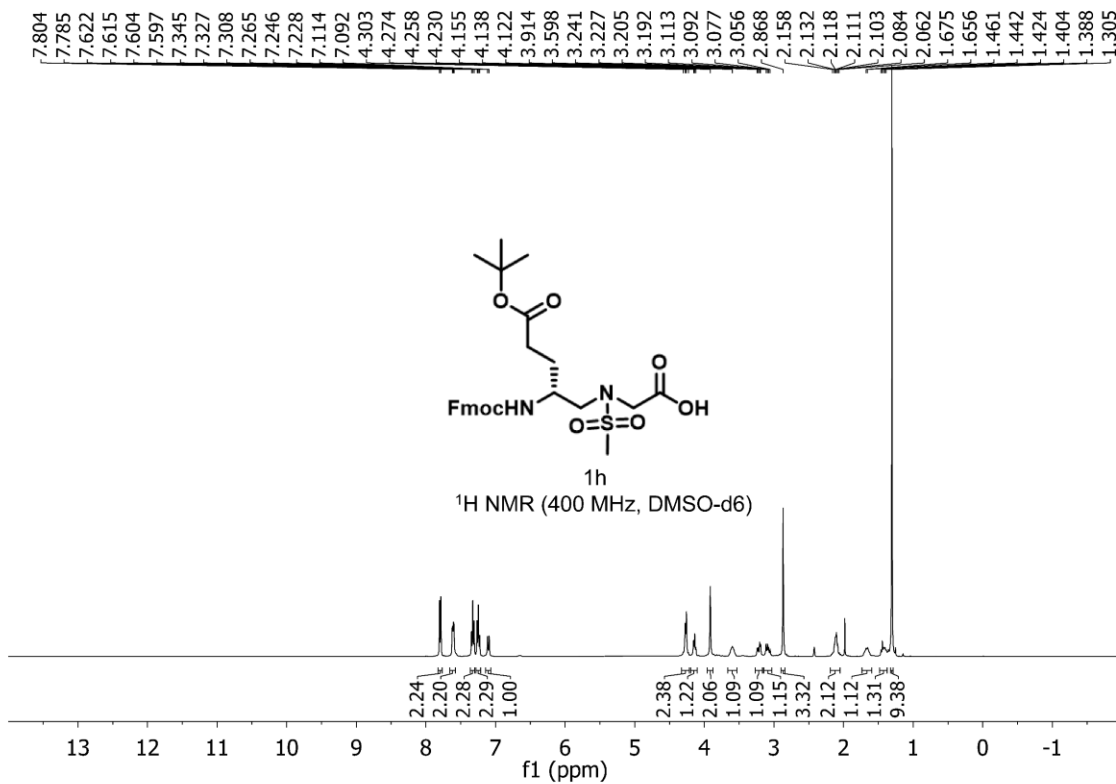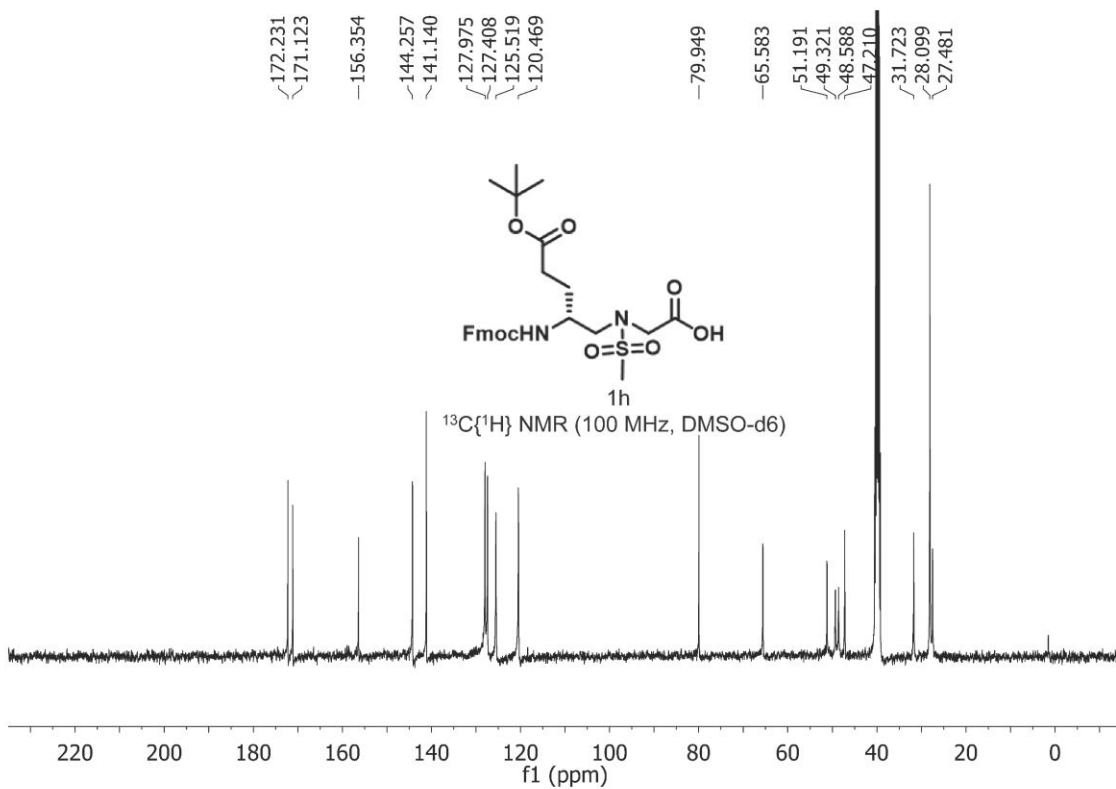

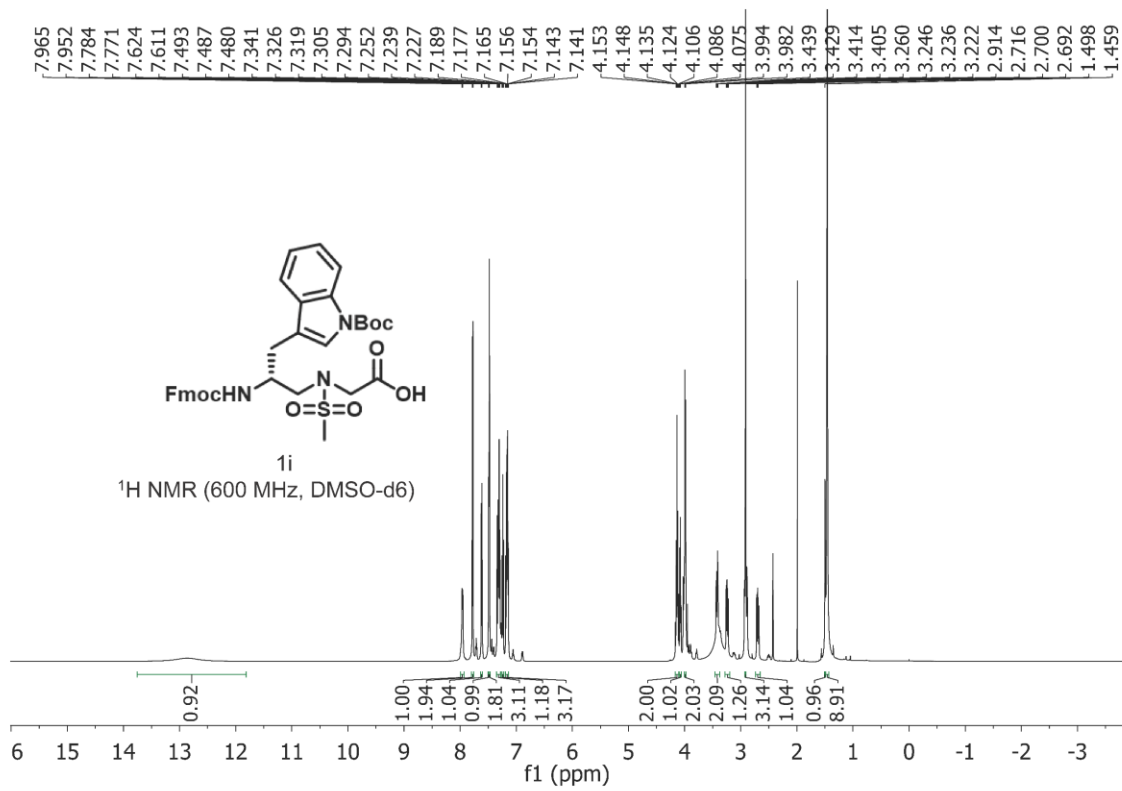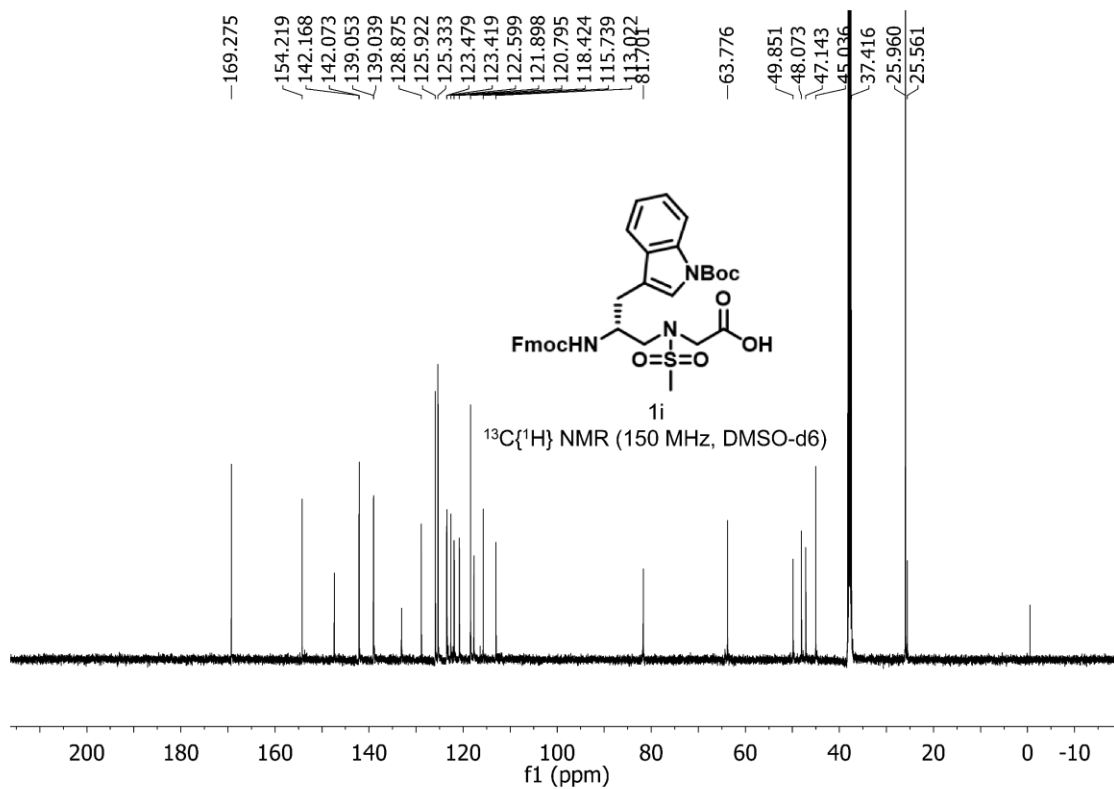

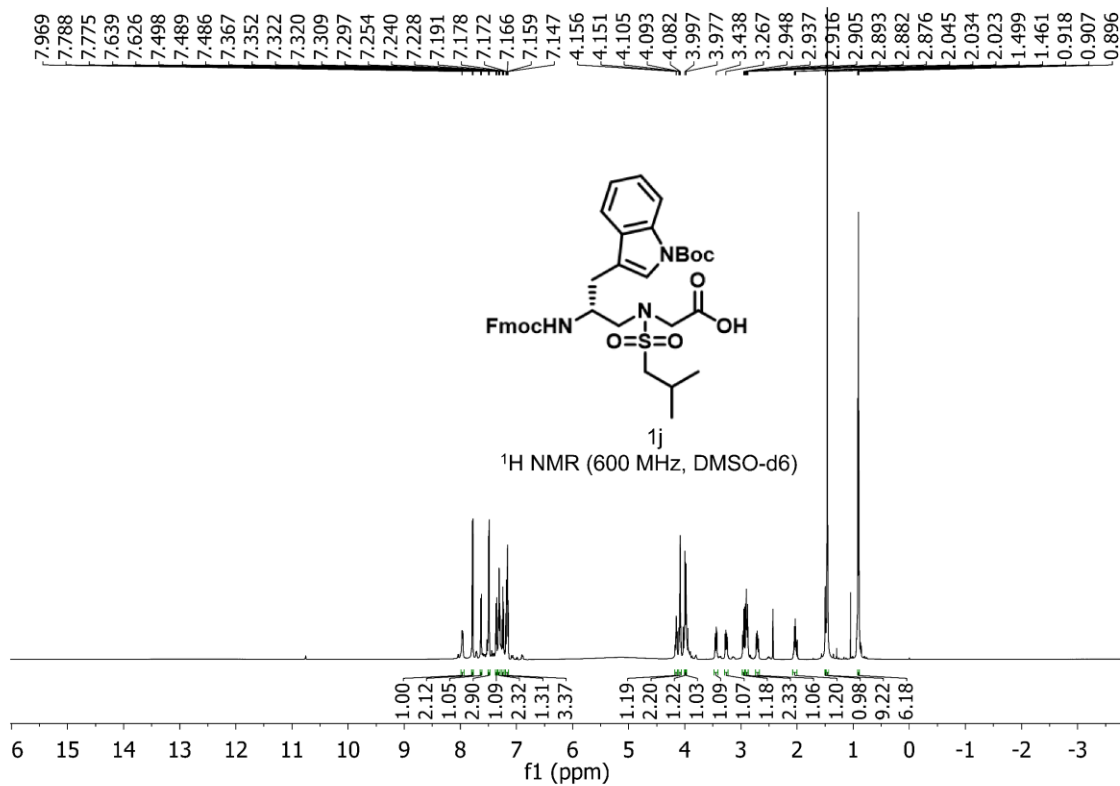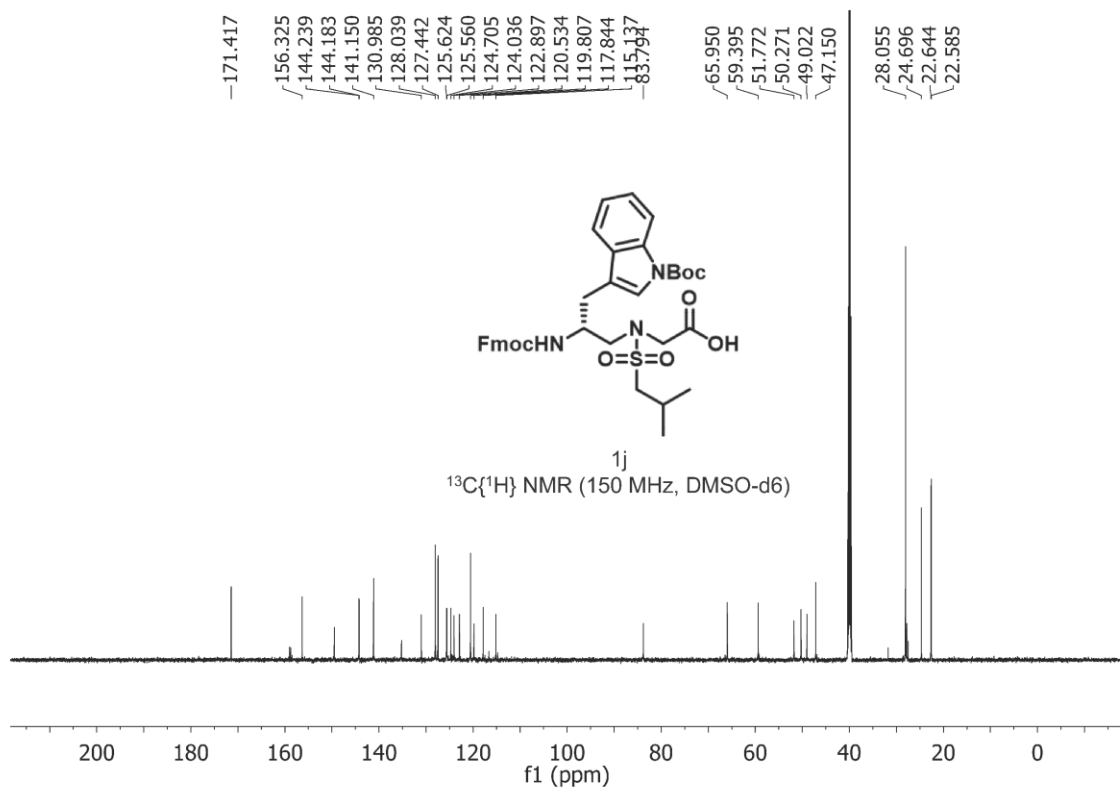

Supplement: NIHMS1706459-supplement-Supplement.pdf [file NIHMS1706459-supplement-Supplement.pdf]
